# Supplementary material for: Internal migration and health in South Africa: determinants of healthcare utilisation in a young adult cohort
Source: PubMed Central journal article supplement (PMC7981972; doi:10.1186/s12889-021-10590-6), 2021-03-20
Supplement: 12889_2021_10590_MOESM1_ESM.pdf [file 12889_2021_10590_MOESM1_ESM.pdf]

**UNIVERSITY OF THE WITWATERSRAND/BROWN UNIVERSITY**

**MIGRANT HEALTH FOLLOW-UP STUDY**

**Wave 1 Questionnaire**

The following is the print version of the questionnaire as generated by the Research Electronic Data Capture software, REDCap, hosted at the University of the Witwatersrand.

# Pre Interview

---

record\_id Record ID

---

\_\_\_\_\_

---

Interviewer Name

---

Confirm that [respondent\_id] is the correct respondent ID

Yes  
 No

---

Sample Type

Untraceable

---

respondent\_name

---

\_\_\_\_\_

---

Confirm the respondent's name is [respondent\_name].

Yes  
 No

---

If the person you are talking to is not [respondent\_name], terminate the interview and locate the correct respondent.

---

respondent\_sex

---

\_\_\_\_\_

---

Confirm the respondent's sex is [respondent\_sex].

Yes  
 No

---

If the person you are talking to is not [respondent\_sex], terminate the interview and locate the correct respondent.

---

respondent\_dob

---

\_\_\_\_\_

---

Confirm the respondent's date of birth is [respondent\_dob].

Yes  
 No

---

If the person you are talking to was not born on [respondent\_dob], you may be talking to the wrong person. Confirm the identity of the respondent. If it is not the correct respondent, terminate the interview and locate the correct respondent.

---

If you are sure the respondent is the correct respondent but their date of birth is inaccurate, please enter their actual date of birth here:

---

Respondent's origin location

(To be pre-populated from DSS data)

---

Where is the respondent located? What province?

- Mpumalanga
- Gauteng
- Limpopo
- Free State
- KwaZulu Natal
- Eastern Cape
- Western Cape
- Northern Cape
- North West
- Other

---

Please specify:

---

---

Where within Mpumalanga?

- Agincourt study site
- Barberton
- Bushbuckridge
- Dwarsoop
- Game park Mpumalanga
- Gemu / Hazyview
- Graskop/ Pilgrim's rest
- Kangwane (former homeland)
- Kiepersol
- Komatipoort
- Machadodorp
- Malelane
- Mapulaneng / Bushbuckridge
- Marite / Alexandria
- Matsulu
- Middleburg
- Mkhuhlu
- Nelspruit
- Pienaar (Nelspruit)
- Sabie
- Thulamahashe
- White River
- Witbank
- Zwelitsha
- Other Mpumalanga
- Don't know

---

Please specify:

---

---

Where within Gauteng

- Akasia
- Alberton
- Alexandra
- Atteridgeville
- Babelegi
- Bapsfontein
- Bashewa
- Baviaanspoort
- Bekkersdal
- Benoni
- Bhongweni
- Blue Hills
- Boipatong
- Boksburg
- Bon Accord
- Bonamanzi Marina and Country Club
- Bopelong
- Boschkop
- Bosplaas Mathabe
- Bothasgeluk
- Brakpan
- Breswol
- Bronkhorstspuit
- Bultfontein
- Carletonville
- Centurion
- Chartwell
- Cheetah Park
- Chief A Luthuli Park
- City of Johannesburg NU
- Clayville
- Cullinan
- Dainfern
- Daveyton
- Deelkraal Gold Mine
- Derdepoort
- Devon A
- Devon B
- Diepsloot
- Diloppe
- Donkerhoek
- Doornfontein
- Doornkraal
- Downbern
- Drie Ziek
- Duduza
- Dukathole
- East Driefontein
- East Village
- Ebony Park
- Edenvale
- Eersterust
- Ekangala
- Ekurhuleni NU
- Elandsfontein
- Elandsrand
- Elandsridge
- Elsburg Gold Mine
- Emfuleni NU
- Endicott
- Ennerdale
- Etwatwa
- Evaton
- Farmall
- Fochville
- Ga-Rankuwa
- Geluksdal
- Germiston
- Glen Harvie

- Golden Gardens
- Goudvlakte West
- Green Park
- Grootfontein
- Grootvlei
- Haakdoornboom
- Hallgate
- Hammanskraal
- Harry Gwala
- Hartebeesfontein
- Hebron
- Heidelberg
- Hillshaven
- Holfontein
- Impumelelo
- Itsoseng
- Ivory Park
- Johandeo
- Johannesburg
- Kaalfontein
- Kagiso
- Kameeldrift
- Kameelfontein
- Kameelkraal
- Kanana
- Kanana Park
- Katlehong
- Keinfontein
- Kekana Garden
- Kempton Park
- Khutsong
- Kleinfontein
- Kokosi
- Krugersdorp
- Kungwini Part 2
- Kwa-Thema
- Lakeside
- Langaville
- Lanseria
- Laudium
- Lawley
- Leeufontein
- Leeuport
- Lehae
- Lenasia
- Lenasia South
- Lenz
- Lesedi NU
- Letsatsing
- Lindelani Village
- Lucky 7
- Mabopane
- Magaliesburg
- Majaneng
- Makanyaneng
- Malatjie
- Mamello
- Mamelodi
- Mandela Village
- Marokolong
- Mashemong
- Mayibuye
- Merafong City NU
- Meyerton
- Midrand
- Midvaal NU
- Millgate Farm
- Mogale City NU
- Mohlakeng
- Mooiplaas
- Munsieville

- Nellmapius
- New Eersterus
- Nigel
- Nooitgecht
- Nufcor
- Oberholzer
- Olievenhoutbos
- Onverwacht
- Orange Farm
- Orient Hills
- Pebble Rock Golf Village
- Phomolong
- Poortjie
- Pretoria
- Rabie Ridge
- Ramotse
- Randburg
- Randfontein
- Randfontein NU
- Randvaal
- Ratanda
- Rayton
- Refilwe
- Rethabiseng
- Rietfontein
- Rietvallei
- Roodeplaat
- Roodepoort
- Sable Hills Waterfront Estate
- Sandton
- Saulsville
- Seberuberung
- Sebokeng
- Sharpeville
- Simunye
- Sonstraal
- Soshanguve
- Southdene
- Soutpan
- Soweto
- Spaarwater
- Springs
- Stinkwater
- Stretford
- Suurman
- Temba
- Tembisa
- The Carousel Casino and Entertainment World
- The Hill
- The Village
- Thembisile
- Thinasonke
- Tierpoort
- Tokoza
- Tsakane
- Tsebe
- Tshepiso
- Tshepisong
- Tshwane NU
- Tweedracht
- Tweefontein
- Vaal Marina
- Vaal Oewer
- Vaalbank
- Vanderbijlpark
- Vastfontein
- Venterspost
- Vereeniging
- Viskuil
- Vlakfontein
- Vosloorus

- Wageenbietjieskop
- Walkerville
- Wallis Haven
- Wallmannsthal
- Waterpan
- Waterval
- Waterworks
- Wattville
- Wedela
- Welverdiend
- West Village
- West-Driefontein
- Western Areas Gold Mine
- Western Deep Levels Mine
- Westonaria
- Westonaria NU
- Winterveld
- Wolwekrans
- Zakariyya Park
- Zenzele
- Zevenfontein
- Zithobeni
- Zwartkop
- Zwavelpoort
- Other
- Don't Know

---

Please specify:

---



---

Where within Limpopo?

- Aganang
- Ba-Phalaborwa
- Bela-Bela
- Blouberg
- Elias Motsoaledi
- Fetakgomo
- Greater Giyani
- Greater Letaba
- Greater Marble Hall
- Greater Tubatse
- Greater Tzaneen
- Lepelle-Nkumpi
- Lephalale
- Makhado
- Makhuduthamaga
- Malamulele
- Maruleng
- Modimolle
- Mogalakwena
- Molemole
- Mookgopong
- Musina
- Polokwane
- Thabazimbi
- Thulamela
- Other
- Don't know

---

Please specify:

---



---

Where within Western Cape?

---

---

Where within Eastern Cape?

---

---

Where within North West?

---

---

Where within KwaZulu Natal?

---

---

Where within Northern Cape?

---

---

Where within Free State?

---

---

Is it rural or urban?

- Rural
- Urban (city or town)
- Don't know

---

Latitude

---

---

Longitude

---

---

Where is the interview taking place?

- Respondent's home
- Respondent's place of work
- A location near the respondent's home
- A location near the respondent's work
- Telephone Interview
- Other

---

Please specify:

---



# Consent

---

---

interview\_consent Has the participant read, signed, and dated the informed consent for the interview?

Yes  
 No

---

interview\_consent\_no For our own purposes, do you mind telling us why you have chosen to not sign the informed consent?

---

anthro\_consent Has the participant read, signed, and dated the informed consent for the collection of the anthropometric measures?

Yes  
 No

---

db\_s\_consent Has the participant read, signed, and dated the informed consent for the collection of the dry blood spot to test for blood sugar

Yes  
 No

---

db\_s\_consent Has the participant read, signed, and dated the informed consent for the collection of the dry blood spot to test for HIV

Yes  
 No

---

hiv\_referral Has the participant indicated they want a referral for HIV testing?

Yes  
 No

---

Self-test provided?

Yes  
 No

---

Has the participant informed consent been signed and dated by fieldworker?

Yes  
 No

---

Has the participant been given the information sheet?

Yes  
 No

# Education and Employment

---

## Form Status

Interview date and start time

---

Now I am going to ask you some questions about your educational history

---

Are you currently enrolled in school/completing any studies/training/certificates?

- Yes
  - No
  - Don't know
- 

In what level of education are you currently engaged?

- Std 1/Grade 3
  - Std 2/Grade 4
  - Std 3/Grade 5
  - Std 4/Grade 6
  - Std 5/Grade 7
  - Std 6/Grade 8
  - Std 7/Grade 9
  - Std 8/Grade 10
  - Std 9/Grade 11
  - Std 10/Matric
  - Technicon- Incomplete
  - Technicon-Complete
  - University - Incomplete
  - University - Complete
  - Adult Basic Education and Training Level 1 (ABET 1)
  - ABET 2
  - ABET 3
  - ABET 4
  - National Qualification Framework Level 1 (NQF 1)
  - NQF 2
  - NQF 3
  - NQF 4
  - Other certificate or diploma
  - Other
  - Don't know
- 

Please specify

---

Are these studies full or part-time?

- Full-time
- Part-time
- Don't know

---

What is the highest level of education you have completed?

- Std 1/Grade 3
- Std 2/Grade 4
- Std 3/Grade 5
- Std 4/Grade 6
- Std 5/Grade 7
- Std 6/Grade 8
- Std 7/Grade 9
- Std 8/Grade 10
- Std 9/Grade 11
- Std 10/Matric
- Technicon- Incomplete
- Technicon-Complete
- University - Incomplete
- University - Complete
- Adult Basic Education and Training Level 1 (ABET 1)
- ABET 2
- ABET 3
- ABET 4
- National Qualification Framework Level 1 (NQF 1)
- NQF 2
- NQF 3
- NQF 4
- Other certificate or diploma
- Other
- Don't know

---

Please specify

---

---

Have you passed matric?

- Yes
- No

---

Now I want to ask you about work. Work is any activity that brings money and other resources into the household from outside and includes formal and informal work and trading.

---

What is your employment status?

- Unemployed, not looking for work
- Unemployed, looking for work
- Employed full time, formal sector
- Employed part time, formal sector
- Employed full time, informal sector
- Employed part time, informal sector
- Self-employed, formal sector
- Self-employed, informal sector

What type of work are you doing?

- Farm work
  - Domestic work
  - Construction work
  - Security work
  - Cleaning work
  - Small business owner
  - Mine work
  - Teacher
  - Traditional healer
  - Health sector (formal)
  - Game farm/game reserve (e.g. ranger)
  - Driver
  - Skilled worker (e.g. plumber, mechanic, electrician)
  - Cook/ chef/ catering
  - Unskilled worker (e.g. general labourer)
  - Artisan (e.g. carpenter, wood carver, weaver)
  - Waiter/ barman
  - Informal selling
  - Small business assistant
  - Clerical and office work
  - Cattle herder
  - Sewing, hairdressing, baking, brewing
  - Police, soldier, fireman
  - Petrol attendant
  - Timber, sawmill, poles
  - Gardening services
  - Fieldworker - NGO or university
  - Art, craft, photography, fashion design
  - Senior administrator, manager, professional
  - Priest/pastor
  - Retail/clerk/sales
  - Student
  - Other
  - Don't know
- ( If unsure of how to classify, select "Other" )

Please specify

\_\_\_\_\_

Is your employment permanent, fixed/period or contract work, or occasional/irregular?

- Permanent
- Fixed period/Contract work
- Occasional/Irregular
- Don't know

On average, how many hours do you work in a typical week?

- 1-10
- 11-20
- 21-30
- 31-40
- 41-50
- 51-60
- 61-70
- 71-80
- 81 or more

---

How much did you (as an individual) earn in total last month?

- No income
- R1 - R400
- R401 - R800
- R 801 - R1 600
- R1 601 - R3 200
- R3 201 - R6 400
- R6 401 - R12 800
- R12 801 - R19 200
- R19 201 - R25 600
- R25 601 - R38 400
- R38 401 - R51 200
- R51 201 - R76 800
- R76 801 - R102 400
- R102 401 - R153 600
- R153 601 - R204 800
- R204 801 - R500 000
- More than R500 000
- Don't know
- Respondent refused  
(This means take home salary)

---

Mark as "Complete" and select "Save and go to next instrument" when complete

# Current Residence

---

---

## CURRENT RESIDENCE

I want to ask you some questions about your residence and employment history. We will start with your current place of residence.

---

Where do you currently live? Please be specific:

---

If possible, collect the address or detailed location of the respondent's current residence:

---

What province is [current\_residence] in?

- Mpumalanga
- Gauteng
- Limpopo
- Free State
- KwaZulu Natal
- Eastern Cape
- Western Cape
- Northern Cape
- North West
- Other country

---

Please specify:

---

Where within Mpumalanga is [current\_residence]?

- Agincourt study site
- Barberton
- Bushbuckridge
- Dwarsloop
- Game park Mpumalanga
- Gemu / Hazyview
- Graskop/ Pilgrim's rest
- Kangwane (former homeland)
- Kiepersol
- Komatipoort
- Machadodorp
- Malelane
- Mapulaneng / Bushbuckridge
- Marite / Alexandria
- Matsulu
- Middleburg
- Mkhuhlu
- Nelspruit
- Pienaar (Nelspruit)
- Sabie
- Thulamahashe
- White River
- Witbank
- Zwelitsha
- Other Mpumalanga
- Don't know

---

Please specify:

---

Where within Gauteng is [current\_residence]?

- Akasia
- Alberton
- Alexandra
- Atteridgeville
- Babelagi
- Bapsfontein
- Bashewa
- Baviaanspoort
- Bekkersdal
- Benoni
- Bhongweni
- Boipatong
- Boksburg
- Bon Accord
- Bophelong
- Boschkop
- Bosplaas Mathabe
- Bothasgeluk
- Brakpan
- Breswol
- Bronkhorstspuit
- Bultfontein
- Carletonville
- Centurion
- Chartwell
- Cheetah Park
- Chief A Luthuli Park
- City of Johannesburg
- Clayville
- Cullinan
- Dainfern
- Daveyton
- Deelkraal Gold Mine
- Derdepoort
- Devon A
- Devon B
- Diepsloot
- Diloppe
- Donkerhoek
- Doornfontein
- Doornkraal
- Downbern
- Drie Ziek
- Duduza
- Dukathole
- East Driefontein
- East Village
- Ebony Park
- Edenvale
- Eersterust
- Ekangala
- Ekurhuleni
- Elandsfontein
- Elandsrand
- Elandsridge
- Elsburg Gold Mine
- Emfuleni
- Endicott
- Ennerdale
- Etwatwa
- Evaton
- Farmall
- Fochville
- Ga-Rankuwa
- Geluksdal
- Germiston
- Glen Harvie
- Golden Gardens
- Goudvlakte West



- Green Park
- Grootfontein
- Grootvlei
- Haakdoornboom
- Hallgate
- Hammanskraal
- Harry Gwala
- Hartebeesfontein
- Hebron
- Heidelberg
- Hillshaven
- Impumelelo
- Itsoseng
- Ivory Park
- Johandeo
- Johannesburg
- Kaalfontein
- Kagiso
- Kameeldrift
- Kameelfontein
- Kameelkraal
- Kanana
- Kanana Park
- Katlehong
- Keinfontein
- Kekana Garden
- Kempton Park
- Khutsong
- Kleinfontein
- Kokosi
- Krugersdorp
- Kungwini Part 2
- Kwa-Thema
- Lakeside
- Langaville
- Lanseria
- Laudium
- Lawley
- Leeufontein
- Leeuport
- Lehae
- Lenasia
- Lenasia South
- Lenz
- Lesedi
- Letsatsing
- Lindelani Village
- Mabopane
- Magaliesburg
- Majaneng
- Makanyaneng
- Malatjie
- Mamello
- Mamelodi
- Mandela Village
- Marokolong
- Mashemong
- Mayibuye
- Merafong City
- Meyerton
- Midrand
- Midvaal
- Millgate Farm
- Mogale City
- Mohlakeng
- Mooiplaas
- Munsieville
- Nellmapius
- New Eersterus
- Nigel
- Nooitgecht

- Nufcor
- Oberholzer
- Olievenhoutbos
- Onverwacht
- Orange Farm
- Orient Hills
- Other Gauteng
- Pebble Rock Golf Village
- Phomolong
- Poortjie
- Pretoria
- Rabie Ridge
- Ramotse
- Randburg
- Randfontein
- Randvaal
- Ratanda
- Rayton
- Refilwe
- Rethabiseng
- Rietfontein
- Rietvallei
- Roodeplaat
- Roodepoort
- Sable Hills Waterfront Estate
- Sandton
- Saulsville
- Seberuberung
- Sebokeng
- Sharpeville
- Simunye
- Sonstraal
- Soshanguve
- Southdene
- Soutpan
- Soweto
- Spaarwater
- Springs
- Stinkwater
- Stretford
- Suurman
- Temba
- Tembisa
- The Hill
- The Village
- Thembisile
- Thinasonke
- Tierpoort
- Tokoza
- Tsakane
- Tsebe
- Tshepiso
- Tshepising
- Tshwane
- Tweedracht
- Tweefontein
- Vaal Marina
- Vaal Oewer
- Vaalbank
- Vanderbijlpark
- Vastfontein
- Venterspost
- Vereeniging
- Viskuil
- Vlakfontein
- Vosloorus
- Wageenbietjieskop
- Walkerville
- Wallis Haven
- Wallmannsthal
- Waterpan

- Waterval
- Waterworks
- Wattville
- Wedela
- Wilverdiend
- West Village
- West-Driefontein
- Western Areas Gold Mine
- Western Deep Levels Mine
- Westonaria
- Winterveld
- Wolwekrans
- Zakariyya Park
- Zenzele
- Zithobeni
- Zwartkop
- Zwavelpoort
- Other Gauteng
- Don't know

Please specify:

---

Where within Limpopo is [current\_residence]?

- Aganang
- Ba-Phalaborwa
- Bela-Bela
- Blouberg
- Elias Motsoaledi
- Fetakgomo
- Greater Giyani
- Greater Letaba
- Greater Marble Hall
- Greater Tubatse
- Greater Tzaneen
- Lepelle-Nkumpi
- Lephalele
- Makhado
- Makhuduthamaga
- Malamulele
- Maruleng
- Modimolle
- Mogalakwena
- Molemole
- Mookgopong
- Musina
- Polokwane
- Thabazimbi
- Thulamela
- Other
- Don't know

Please specify:

---

Where within Western Cape is [current\_residence]?

---

Where within Eastern Cape is [current\_residence]?

---

Where within North West is [current\_residence]?

---

---

Where within KwaZulu Natal is [current\_residence]?

---

---

Where within Northern Cape is [current\_residence]?

---

---

Where within Free State is [current\_residence]?

---

---

Is it rural or urban?

- Rural  
 Urban (city or town)  
 Don't know  
(Rural meaning locations like villages, agricultural areas, or game farms)

---

When did you start living here? Enter MONTH

- January  
 February  
 March  
 April  
 May  
 June  
 July  
 August  
 September  
 October  
 November  
 December  
 Don't know

---

When did you start living here? Enter YEAR

- 2019
- 2018
- 2017
- 2016
- 2015
- 2014
- 2013
- 2012
- 2011
- 2010
- 2009
- 2008
- 2007
- 2006
- 2005
- 2004
- 2003
- 2002
- 2001
- 2000
- 1999
- 1998
- 1997
- 1996
- 1995
- 1994
- 1993
- 1992
- 1991
- 1990
- 1989
- 1988
- 1987
- 1986
- 1985
- 1984
- 1983
- 1982
- 1981
- 1980
- Don't Know

---

In what type of place do you live?

- Commercial farm
- Game farm/nature reserve
- Mine
- Military base
- City (inner)
- City (suburb)
- Town
- Village (trust land)
- Informal settlement (city)
- Informal settlement (rural)
- Township (urban)
- Township (rural)
- Other
- Don't know

---

Please specify

---

What type of dwelling do you live in?

- House, brick or concrete structure on a separate stand
- Traditional dwelling, hut or structure made of traditional materials
- Flat or apartment in a block of flats/complex
- Cluster house in a complex
- Townhouse
- Semi-detached house not in a complex
- House, flat or room separate from main dwelling in backyard
- Informal dwelling or shack in backyard
- Informal dwelling NOT in backyard, e.g. in informal squatter settlement or on a farm
- Room or flat which is part of main dwelling or property
- Caravan or tent
- Unit in a retirement home or barracks etc.
- Other
- Don't know

Please specify

\_\_\_\_\_

Not including yourself, how many household members are there at this residence?

\_\_\_\_\_

(For these questions we mean where the respondent is CURRENTLY LIVING. By household members, we mean people living in the same physical structure as the respondent, who they share most meals with and/or share resources with.)

FOR FIELDWORKER: Is the respondent's origin location ([q\_1\_5]) the same as their current residence ([current\_residence])?

- Yes
- No

Are you the head of the household?

- Yes
  - No
- (The head of household is a person who is responsible for generating and managing the largest part of the household income)

Who is the current head of the household?

\_\_\_\_\_

(For these questions we meant where the respondent is CURRENTLY LIVING. The head of household is a person who is responsible for generating and managing the largest part of the household income)

How many household members are under 18 years old?

\_\_\_\_\_

How many household members are over 18 years old?

\_\_\_\_\_

(This should include the respondent)

Note to interviewer: Total is [q\_4\_9\_4]. Total should be [q\_4\_9\_3].

\_\_\_\_\_

---

Mark as "Complete" and select "Save and go to next instrument" when complete.

# H H Roster

---

Repeat for all [q\_4\_7] other household members

## HOUSEHOLD ROSTER

(1) Name of household member:

---

Start with the head of the household (if not the respondent) and then those closest to the respondent. Include the name and surname of all household members.

(1) Is [q\_5\_11] the household head?

- Yes  
 No

(1) Is [q\_5\_11] male or female?

- Male  
 Female

(1) What is [q\_5\_11]'s relation to you?

- Mother  
 Father  
 Brother  
 Sister  
 Spouse/partner/boyfriend/girlfriend  
 Son  
 Daughter  
 Maternal Grandmother  
 Maternal Grandfather  
 Paternal Grandmother  
 Paternal Grandfather  
 Maternal Aunt  
 Maternal Uncle  
 Paternal Aunt  
 Paternal Uncle  
 Niece  
 Nephew  
 Friend  
 Countrymen/Co-worker  
 Mother-in-law  
 Father-in-law  
 Brother-in-law  
 Sister-in-law  
 Son-in-law  
 Daughter-in-law  
 Other

(1) Please specify:



(1) What is [q\_5\_11]'s occupation?

- None/Unemployed (receive social grant)
- None/Unemployed (do not receive social grant)
- Farm work
- Domestic work
- Construction work
- Security work
- Cleaning work
- Small business owner
- Mine work
- Teacher
- Traditional healer
- Health sector (formal)
- Game farm/game reserve (e.g. ranger)
- Driver
- Skilled worker (e.g. plumber, mechanic, electrician)
- Cook/ chef/ catering
- Unskilled worker (e.g. general labourer)
- Artisan (e.g. carpenter, wood carver, weaver)
- Waiter/ barman
- Informal selling
- Small business assistant
- Clerical and office work
- Cattle herder
- Sewing, hairdressing, baking, brewing
- Police, soldier, fireman
- Petrol attendant
- Timber, sawmill, poles
- Gardening services
- Fieldworker - NGO or university
- Art, craft, photography, fashion design
- Senior administrator, manager, professional
- Priest/pastor
- Retail/clerk/sales
- Student
- Other
- Don't know

(1) Please specify:

\_\_\_\_\_

(1) How old is [q\_5\_11]?

\_\_\_\_\_

(2) Name of household member:

\_\_\_\_\_  
(Include Name and Surname.)

(2) Is [q\_5\_12] the household head?

- Yes
- No

(2) Is [q\_5\_12] male or female?

- Male
- Female

---

(2) What is [q\_5\_12]'s relation to you?

- Mother
- Father
- Brother
- Sister
- Spouse/partner/boyfriend/girlfriend
- Son
- Daughter
- Maternal Grandmother
- Maternal Grandfather
- Paternal Grandmother
- Paternal Grandfather
- Maternal Aunt
- Maternal Uncle
- Paternal Aunt
- Paternal Uncle
- Niece
- Nephew
- Friend
- Countrymen/Co-worker
- Mother-in-law
- Father-in-law
- Brother-in-law
- Sister-in-law
- Son-in-law
- Daughter-in-law
- Other

---

(2) Please specify:

---

---

(2) What is [q\_5\_12]'s occupation?

- None/Unemployed (receive social grant)
- None/Unemployed (do not receive social grant)
- Farm work
- Domestic work
- Construction work
- Security work
- Cleaning work
- Small business owner
- Mine work
- Teacher
- Traditional healer
- Health sector (formal)
- Game farm/game reserve (e.g. ranger)
- Driver
- Skilled worker (e.g. plumber, mechanic, electrician)
- Cook/ chef/ catering
- Unskilled worker (e.g. general labourer)
- Artisan (e.g. carpenter, wood carver, weaver)
- Waiter/ barman
- Informal selling
- Small business assistant
- Clerical and office work
- Cattle herder
- Sewing, hairdressing, baking, brewing
- Police, soldier, fireman
- Petrol attendant
- Timber, sawmill, poles
- Gardening services
- Fieldworker - NGO or university
- Art, craft, photography, fashion design
- Senior administrator, manager, professional
- Priest/pastor
- Retail/clerk/sales
- Other
- Don't know

---

(2) Please specify:

\_\_\_\_\_

---

(2) How old is [q\_5\_12]?

\_\_\_\_\_

---

(3) Name of household member:

\_\_\_\_\_  
(Include Name and Surname.)

---

(3) Is [q\_5\_13] the household head?

- Yes
- No

---

(3) Is [q\_5\_13] male or female?

- Male
- Female

---

(3) What is [q\_5\_13]'s relation to you?

- Mother
- Father
- Brother
- Sister
- Spouse/partner/boyfriend/girlfriend
- Son
- Daughter
- Maternal Grandmother
- Maternal Grandfather
- Paternal Grandmother
- Paternal Grandfather
- Maternal Aunt
- Maternal Uncle
- Paternal Aunt
- Paternal Uncle
- Niece
- Nephew
- Friend
- Countrymen/Co-worker
- Mother-in-law
- Father-in-law
- Brother-in-law
- Sister-in-law
- Son-in-law
- Daughter-in-law
- Other

---

(3) Please specify:

---

(3) What is [q\_5\_13]'s occupation?

- None/Unemployed (receive social grant)
- None/Unemployed (do not receive social grant)
- Farm work
- Domestic work
- Construction work
- Security work
- Cleaning work
- Small business owner
- Mine work
- Teacher
- Traditional healer
- Health sector (formal)
- Game farm/game reserve (e.g. ranger)
- Driver
- Skilled worker (e.g. plumber, mechanic, electrician)
- Cook/ chef/ catering
- Unskilled worker (e.g. general labourer)
- Artisan (e.g. carpenter, wood carver, weaver)
- Waiter/ barman
- Informal selling
- Small business assistant
- Clerical and office work
- Cattle herder
- Sewing, hairdressing, baking, brewing
- Police, soldier, fireman
- Petrol attendant
- Timber, sawmill, poles
- Gardening services
- Fieldworker - NGO or university
- Art, craft, photography, fashion design
- Senior administrator, manager, professional
- Priest/pastor
- Retail/clerk/sales
- Student
- Other
- Don't know

(3) Please specify:

\_\_\_\_\_

(3) How old is [q\_5\_13]?

\_\_\_\_\_

(4) Name of household member:

\_\_\_\_\_  
(Include Name and Surname.)

(4) Is [q\_5\_14] the household head?

- Yes
- No

(4) Is [q\_5\_14] male or female?

- Male
- Female

---

(4) What is [q\_5\_14]'s relation to you?

- Mother
- Father
- Brother
- Sister
- Spouse/partner/boyfriend/girlfriend
- Son
- Daughter
- Maternal Grandmother
- Maternal Grandfather
- Paternal Grandmother
- Paternal Grandfather
- Maternal Aunt
- Maternal Uncle
- Paternal Aunt
- Paternal Uncle
- Niece
- Nephew
- Friend
- Countrymen/Co-worker
- Mother-in-law
- Father-in-law
- Brother-in-law
- Sister-in-law
- Son-in-law
- Daughter-in-law
- Other

---

(4) Please specify:

---

(4) What is [q\_5\_14]'s occupation?

- None/Unemployed (receive social grant)
- None/Unemployed (do not receive social grant)
- Farm work
- Domestic work
- Construction work
- Security work
- Cleaning work
- Small business owner
- Mine work
- Teacher
- Traditional healer
- Health sector (formal)
- Game farm/game reserve (e.g. ranger)
- Driver
- Skilled worker (e.g. plumber, mechanic, electrician)
- Cook/ chef/ catering
- Unskilled worker (e.g. general labourer)
- Artisan (e.g. carpenter, wood carver, weaver)
- Waiter/ barman
- Informal selling
- Small business assistant
- Clerical and office work
- Cattle herder
- Sewing, hairdressing, baking, brewing
- Police, soldier, fireman
- Petrol attendant
- Timber, sawmill, poles
- Gardening services
- Fieldworker - NGO or university
- Art, craft, photography, fashion design
- Senior administrator, manager, professional
- Priest/pastor
- Retail/clerk/sales
- Student
- Other
- Don't know

(4) Please specify:

\_\_\_\_\_

(4) How old is [q\_5\_14]?

\_\_\_\_\_

(5) Name of household member:

\_\_\_\_\_  
(Include Name and Surname.)

(5) Is [q\_5\_15] the household head?

- Yes
- No

(5) Is [q\_5\_15] male or female?

- Male
- Female

---

(5) What is [q\_5\_15]'s relation to you?

- Mother
- Father
- Brother
- Sister
- Spouse/partner/boyfriend/girlfriend
- Son
- Daughter
- Maternal Grandmother
- Maternal Grandfather
- Paternal Grandmother
- Paternal Grandfather
- Maternal Aunt
- Maternal Uncle
- Paternal Aunt
- Paternal Uncle
- Niece
- Nephew
- Friend
- Countrymen/Co-worker
- Mother-in-law
- Father-in-law
- Brother-in-law
- Sister-in-law
- Son-in-law
- Daughter-in-law
- Other

---

(5) Please specify:

---



(5) What is [q\_5\_15]'s occupation?

- None/Unemployed (receive social grant)
- None/Unemployed (do not receive social grant)
- Farm work
- Domestic work
- Construction work
- Security work
- Cleaning work
- Small business owner
- Mine work
- Teacher
- Traditional healer
- Health sector (formal)
- Game farm/game reserve (e.g. ranger)
- Driver
- Skilled worker (e.g. plumber, mechanic, electrician)
- Cook/ chef/ catering
- Unskilled worker (e.g. general labourer)
- Artisan (e.g. carpenter, wood carver, weaver)
- Waiter/ barman
- Informal selling
- Small business assistant
- Clerical and office work
- Cattle herder
- Sewing, hairdressing, baking, brewing
- Police, soldier, fireman
- Petrol attendant
- Timber, sawmill, poles
- Gardening services
- Fieldworker - NGO or university
- Art, craft, photography, fashion design
- Senior administrator, manager, professional
- Priest/pastor
- Retail/clerk/sales
- Student
- Other
- Don't know

(5) Please specify:

\_\_\_\_\_

(5) How old is [q\_5\_15]?

\_\_\_\_\_

(6) Name of household member:

\_\_\_\_\_  
(Include Name and Surname.)

(6) Is [q\_5\_16] the household head?

- Yes
- No

(6) Is [q\_5\_16] male or female?

- Male
- Female

---

(6) What is [q\_5\_16]'s relation to you?

- Mother
- Father
- Brother
- Sister
- Spouse/partner/boyfriend/girlfriend
- Son
- Daughter
- Maternal Grandmother
- Maternal Grandfather
- Paternal Grandmother
- Paternal Grandfather
- Maternal Aunt
- Maternal Uncle
- Paternal Aunt
- Paternal Uncle
- Niece
- Nephew
- Friend
- Countrymen/Co-worker
- Mother-in-law
- Father-in-law
- Brother-in-law
- Sister-in-law
- Son-in-law
- Daughter-in-law
- Other

---

(6) Please specify:

---

---

(6) What is [q\_5\_16]'s occupation?

- None/Unemployed (receive social grant)
- None/Unemployed (do not receive social grant)
- Farm work
- Domestic work
- Construction work
- Security work
- Cleaning work
- Small business owner
- Mine work
- Teacher
- Traditional healer
- Health sector (formal)
- Game farm/game reserve (e.g. ranger)
- Driver
- Skilled worker (e.g. plumber, mechanic, electrician)
- Cook/ chef/ catering
- Unskilled worker (e.g. general labourer)
- Artisan (e.g. carpenter, wood carver, weaver)
- Waiter/ barman
- Informal selling
- Small business assistant
- Clerical and office work
- Cattle herder
- Sewing, hairdressing, baking, brewing
- Police, soldier, fireman
- Petrol attendant
- Timber, sawmill, poles
- Gardening services
- Fieldworker - NGO or university
- Art, craft, photography, fashion design
- Senior administrator, manager, professional
- Priest/pastor
- Retail/clerk/sales
- Other
- Don't know

---

(6) Please specify:

\_\_\_\_\_

---

(6) How old is [q\_5\_16]?

\_\_\_\_\_

---

(7) Name of household member:

\_\_\_\_\_  
(Include Name and Surname.)

---

(7) Is [q\_5\_17] the household head?

- Yes
- No

---

(7) Is [q\_5\_17] male or female?

- Male
- Female

---

(7) What is [q\_5\_17]'s relation to you?

- Mother
- Father
- Brother
- Sister
- Spouse/partner/boyfriend/girlfriend
- Son
- Daughter
- Maternal Grandmother
- Maternal Grandfather
- Paternal Grandmother
- Paternal Grandfather
- Maternal Aunt
- Maternal Uncle
- Paternal Aunt
- Paternal Uncle
- Niece
- Nephew
- Friend
- Countrymen/Co-worker
- Mother-in-law
- Father-in-law
- Brother-in-law
- Sister-in-law
- Son-in-law
- Daughter-in-law
- Other

---

(7) Please specify:

---

(7) What is [q\_5\_17]'s occupation?

- None/Unemployed (receive social grant)
- None/Unemployed (do not receive social grant)
- Farm work
- Domestic work
- Construction work
- Security work
- Cleaning work
- Small business owner
- Mine work
- Teacher
- Traditional healer
- Health sector (formal)
- Game farm/game reserve (e.g. ranger)
- Driver
- Skilled worker (e.g. plumber, mechanic, electrician)
- Cook/ chef/ catering
- Unskilled worker (e.g. general labourer)
- Artisan (e.g. carpenter, wood carver, weaver)
- Waiter/ barman
- Informal selling
- Small business assistant
- Clerical and office work
- Cattle herder
- Sewing, hairdressing, baking, brewing
- Police, soldier, fireman
- Petrol attendant
- Timber, sawmill, poles
- Gardening services
- Fieldworker - NGO or university
- Art, craft, photography, fashion design
- Senior administrator, manager, professional
- Priest/pastor
- Retail/clerk/sales
- Other
- Don't know

(7) Please specify:

\_\_\_\_\_

(7) How old is [q\_5\_17]?

\_\_\_\_\_

(8) Name of household member:

\_\_\_\_\_  
(Include Name and Surname.)

(8) Is [q\_5\_18] the household head?

- Yes
- No

(8) Is [q\_5\_18] male or female?

- Male
- Female

---

(8) What is [q\_5\_18]'s relation to you?

- Mother
- Father
- Brother
- Sister
- Spouse/partner/boyfriend/girlfriend
- Son
- Daughter
- Maternal Grandmother
- Maternal Grandfather
- Paternal Grandmother
- Paternal Grandfather
- Maternal Aunt
- Maternal Uncle
- Paternal Aunt
- Paternal Uncle
- Niece
- Nephew
- Friend
- Countrymen/Co-worker
- Mother-in-law
- Father-in-law
- Brother-in-law
- Sister-in-law
- Son-in-law
- Daughter-in-law
- Other

---

(8) Please specify:

---

(8) What is [q\_5\_18]'s occupation?

- None/Unemployed (receive social grant)
- None/Unemployed (do not receive social grant)
- Farm work
- Domestic work
- Construction work
- Security work
- Cleaning work
- Small business owner
- Mine work
- Teacher
- Traditional healer
- Health sector (formal)
- Game farm/game reserve (e.g. ranger)
- Driver
- Skilled worker (e.g. plumber, mechanic, electrician)
- Cook/ chef/ catering
- Unskilled worker (e.g. general labourer)
- Artisan (e.g. carpenter, wood carver, weaver)
- Waiter/ barman
- Informal selling
- Small business assistant
- Clerical and office work
- Cattle herder
- Sewing, hairdressing, baking, brewing
- Police, soldier, fireman
- Petrol attendant
- Timber, sawmill, poles
- Gardening services
- Fieldworker - NGO or university
- Art, craft, photography, fashion design
- Senior administrator, manager, professional
- Priest/pastor
- Retail/clerk/sales
- Other
- Don't know

(8) Please specify:

\_\_\_\_\_

(8) How old is [q\_5\_18]?

\_\_\_\_\_

(9) Name of household member:

\_\_\_\_\_  
(Include Name and Surname.)

(9) Is [q\_5\_19] the household head?

- Yes
- No

(9) Is [q\_5\_19] male or female?

- Male
- Female

---

(9) What is [q\_5\_19]'s relation to you?

- Mother
- Father
- Brother
- Sister
- Spouse/partner/boyfriend/girlfriend
- Son
- Daughter
- Maternal Grandmother
- Maternal Grandfather
- Paternal Grandmother
- Paternal Grandfather
- Maternal Aunt
- Maternal Uncle
- Paternal Aunt
- Paternal Uncle
- Niece
- Nephew
- Friend
- Countrymen/Co-worker
- Mother-in-law
- Father-in-law
- Brother-in-law
- Sister-in-law
- Son-in-law
- Daughter-in-law
- Other

---

(9) Please specify:

---



(9) What is [q\_5\_19]'s occupation?

- None/Unemployed (receive social grant)
- None/Unemployed (do not receive social grant)
- Farm work
- Domestic work
- Construction work
- Security work
- Cleaning work
- Small business owner
- Mine work
- Teacher
- Traditional healer
- Health sector (formal)
- Game farm/game reserve (e.g. ranger)
- Driver
- Skilled worker (e.g. plumber, mechanic, electrician)
- Cook/ chef/ catering
- Unskilled worker (e.g. general labourer)
- Artisan (e.g. carpenter, wood carver, weaver)
- Waiter/ barman
- Informal selling
- Small business assistant
- Clerical and office work
- Cattle herder
- Sewing, hairdressing, baking, brewing
- Police, soldier, fireman
- Petrol attendant
- Timber, sawmill, poles
- Gardening services
- Fieldworker - NGO or university
- Art, craft, photography, fashion design
- Senior administrator, manager, professional
- Priest/pastor
- Retail/clerk/sales
- Other
- Don't know

(9) Please specify:

\_\_\_\_\_

(9) How old is [q\_5\_19]?

\_\_\_\_\_

(10) Name of household member:

\_\_\_\_\_  
(Include Name and Surname.)

(10) Is [q\_5\_110] the household head?

- Yes
- No

(10) Is [q\_5\_110] male or female?

- Male
- Female

---

(10) What is [q\_5\_110]'s relation to you?

- Mother
- Father
- Brother
- Sister
- Spouse/partner/boyfriend/girlfriend
- Son
- Daughter
- Maternal Grandmother
- Maternal Grandfather
- Paternal Grandmother
- Paternal Grandfather
- Maternal Aunt
- Maternal Uncle
- Paternal Aunt
- Paternal Uncle
- Niece
- Nephew
- Friend
- Countrymen/Co-worker
- Mother-in-law
- Father-in-law
- Brother-in-law
- Sister-in-law
- Son-in-law
- Daughter-in-law
- Other

---

(10) Please specify:

---

---

(10) What is [q\_5\_110]'s occupation?

- None/Unemployed (receive social grant)
- None/Unemployed (do not receive social grant)
- Farm work
- Domestic work
- Construction work
- Security work
- Cleaning work
- Small business owner
- Mine work
- Teacher
- Traditional healer
- Health sector (formal)
- Game farm/game reserve (e.g. ranger)
- Driver
- Skilled worker (e.g. plumber, mechanic, electrician)
- Cook/ chef/ catering
- Unskilled worker (e.g. general labourer)
- Artisan (e.g. carpenter, wood carver, weaver)
- Waiter/ barman
- Informal selling
- Small business assistant
- Clerical and office work
- Cattle herder
- Sewing, hairdressing, baking, brewing
- Police, soldier, fireman
- Petrol attendant
- Timber, sawmill, poles
- Gardening services
- Fieldworker - NGO or university
- Art, craft, photography, fashion design
- Senior administrator, manager, professional
- Priest/pastor
- Retail/clerk/sales
- Other
- Don't know

---

(10) Please specify:

\_\_\_\_\_

---

(10) How old is [q\_5\_110]?

\_\_\_\_\_

---

(11) Name of household member:

\_\_\_\_\_  
(Include Name and Surname.)

---

(11) Is [q\_5\_111] the household head?

- Yes
- No

---

(11) Is [q\_5\_111] male or female?

- Male
- Female

---

(11) What is [q\_5\_111]'s relation to you?

- Mother
- Father
- Brother
- Sister
- Spouse/partner/boyfriend/girlfriend
- Son
- Daughter
- Maternal Grandmother
- Maternal Grandfather
- Paternal Grandmother
- Paternal Grandfather
- Maternal Aunt
- Maternal Uncle
- Paternal Aunt
- Paternal Uncle
- Niece
- Nephew
- Friend
- Countrymen/Co-worker
- Mother-in-law
- Father-in-law
- Brother-in-law
- Sister-in-law
- Son-in-law
- Daughter-in-law
- Other

---

(11) Please specify:

---

(11) What is [q\_5\_111]'s occupation?

- None/Unemployed (receive social grant)
- None/Unemployed (do not receive social grant)
- Farm work
- Domestic work
- Construction work
- Security work
- Cleaning work
- Small business owner
- Mine work
- Teacher
- Traditional healer
- Health sector (formal)
- Game farm/game reserve (e.g. ranger)
- Driver
- Skilled worker (e.g. plumber, mechanic, electrician)
- Cook/ chef/ catering
- Unskilled worker (e.g. general labourer)
- Artisan (e.g. carpenter, wood carver, weaver)
- Waiter/ barman
- Informal selling
- Small business assistant
- Clerical and office work
- Cattle herder
- Sewing, hairdressing, baking, brewing
- Police, soldier, fireman
- Petrol attendant
- Timber, sawmill, poles
- Gardening services
- Fieldworker - NGO or university
- Art, craft, photography, fashion design
- Senior administrator, manager, professional
- Priest/pastor
- Retail/clerk/sales
- Other
- Don't know

(11) Please specify:

\_\_\_\_\_

(11) How old is [q\_5\_111]?

\_\_\_\_\_

(12) Name of household member:

\_\_\_\_\_  
(Include Name and Surname.)

(12) Is [q\_5\_112] the household head?

- Yes
- No

(12) Is [q\_5\_112] male or female?

- Male
- Female

---

(12) What is [q\_5\_112]'s relation to you?

- Mother
- Father
- Brother
- Sister
- Spouse/partner/boyfriend/girlfriend
- Son
- Daughter
- Maternal Grandmother
- Maternal Grandfather
- Paternal Grandmother
- Paternal Grandfather
- Maternal Aunt
- Maternal Uncle
- Paternal Aunt
- Paternal Uncle
- Niece
- Nephew
- Friend
- Countrymen/Co-worker
- Mother-in-law
- Father-in-law
- Brother-in-law
- Sister-in-law
- Son-in-law
- Daughter-in-law
- Other

---

(12) Please specify:

---

---

(12) What is [q\_5\_112]'s occupation?

- None/Unemployed (receive social grant)
- None/Unemployed (do not receive social grant)
- Farm work
- Domestic work
- Construction work
- Security work
- Cleaning work
- Small business owner
- Mine work
- Teacher
- Traditional healer
- Health sector (formal)
- Game farm/game reserve (e.g. ranger)
- Driver
- Skilled worker (e.g. plumber, mechanic, electrician)
- Cook/ chef/ catering
- Unskilled worker (e.g. general labourer)
- Artisan (e.g. carpenter, wood carver, weaver)
- Waiter/ barman
- Informal selling
- Small business assistant
- Clerical and office work
- Cattle herder
- Sewing, hairdressing, baking, brewing
- Police, soldier, fireman
- Petrol attendant
- Timber, sawmill, poles
- Gardening services
- Fieldworker - NGO or university
- Art, craft, photography, fashion design
- Senior administrator, manager, professional
- Priest/pastor
- Retail/clerk/sales
- Other
- Don't know

---

(12) Please specify:

---

---

(12) How old is [q\_5\_112]?

---

---

When you've entered all [q\_4\_7] household members, select "Save and go to next instrument"

# Residence History

---

---

## RESIDENCE HISTORY

Have you lived anywhere besides the Agincourt study site since age 15 for a period of at least six months?

- Yes  
 No  
 Don't know  
(Double check that this response is accurate.)
- 

Now I want to ask you about your employment history. Not including your current work or employment status, how many other jobs have you held for wages or salary since the age of 15?

---

What was your main reason for moving to this place of residence?

- Job assignment/transfer  
 Retrenchment  
 Better employment opportunities  
 Better accommodation prospects  
 Better educational/training opportunities  
 Closer to school or work  
 Better public/social services  
 Moved with family  
 Joined family or friends  
 Marriage  
 Divorce  
 Death of a family member  
 Family responsibility  
 Attraction to urban life style  
 Evicted from previous residence  
 Not able to pay rent  
 Government resettlement  
 Left to escape violence  
 Other (specify)  
 Dont know
- 

Please specify

---



---

What was your main formal/informal occupation in the month BEFORE you moved?

- None
- Farm work
- Domestic work
- Construction work
- Security work
- Cleaning work
- Small business owner
- Mine work
- Teacher
- Traditional healer
- Health sector (formal)
- Game farm/game reserve (e.g. ranger)
- Driver
- Skilled worker (e.g. plumber, mechanic, electrician)
- Cook/ chef/ catering
- Unskilled worker (e.g. general labourer)
- Artisan (e.g. carpenter, wood carver, weaver)
- Waiter/ barman
- Informal selling
- Small business assistant
- Clerical and office work
- Cattle herder
- Sewing, hairdressing, baking, brewing
- Police, soldier, fireman
- Petrol attendant
- Timber, sawmill, poles
- Gardening services
- Fieldworker - NGO or university
- Art, craft, photography, fashion design
- Senior administrator, manager, professional
- Priest/pastor
- Retail/clerk/sales
- Other
- Don't know  
( If unsure of how to classify, select "Other")

---

Please specify

---

What was your main formal/informal occupation in the month AFTER you moved?

- None
- Farm work
- Domestic work
- Construction work
- Security work
- Cleaning work
- Small business owner
- Mine work
- Teacher
- Traditional healer
- Health sector (formal)
- Game farm/game reserve (e.g. ranger)
- Driver
- Skilled worker (e.g. plumber, mechanic, electrician)
- Cook/ chef/ catering
- Unskilled worker (e.g. general labourer)
- Artisan (e.g. carpenter, wood carver, weaver)
- Waiter/ barman
- Informal selling
- Small business assistant
- Clerical and office work
- Cattle herder
- Sewing, hairdressing, baking, brewing
- Police, soldier, fireman
- Petrol attendant
- Timber, sawmill, poles
- Gardening services
- Fieldworker - NGO or university
- Art, craft, photography, fashion design
- Senior administrator, manager, professional
- Priest/pastor
- Retail/clerk/sales
- Other
- Don't know  
( If unsure of how to classify, select "Other")

Please specify

\_\_\_\_\_

Now I want to ask you about other places you have lived for a period of six months or more since age 15 years. Not including your current residence or [q\_1\_5] how many other places have you lived for a period of at least six months since you were age 15 years?

\_\_\_\_\_ (Double check that this response is accurate.)

Mark as "Complete" and select "Save and go to next instrument" when complete.

# Non Migrant Employment Loop

---

## NON-MIGRANT EMPLOYMENT LOOP

Start with your most recent PREVIOUS job/work for pay/salary and repeat for each of the [q\_6\_2] job you've had since age 15.

---

(1) What was your main formal/informal occupation?

- None
  - Farm work
  - Domestic work
  - Construction work
  - Security work
  - Cleaning work
  - Small business owner
  - Mine work
  - Teacher
  - Traditional healer
  - Health sector (formal)
  - Game farm/game reserve (e.g. ranger)
  - Driver
  - Skilled worker (e.g. plumber, mechanic, electrician)
  - Cook/ chef/ catering
  - Unskilled worker (e.g. general labourer)
  - Artisan (e.g. carpenter, wood carver, weaver)
  - Waiter/ barman
  - Informal selling
  - Small business assistant
  - Clerical and office work
  - Cattle herder
  - Sewing, hairdressing, baking, brewing
  - Police, soldier, fireman
  - Petrol attendant
  - Timber, sawmill, poles
  - Gardening services
  - Fieldworker - NGO or university
  - Art, craft, photography, fashion design
  - Senior administrator, manager, professional
  - Priest/pastor
  - Retail/clerk/sales
  - Other
  - Don't know
- ( If unsure of how to classify, select "Other" )
- 

(1) Please specify

---

---

(1) When did you START this job/work for pay/salary?  
MONTH

- January
- February
- March
- April
- May
- June
- July
- August
- September
- October
- November
- December
- Don't know

---

(1) When did you START this job/work for pay/salary?  
YEAR

- 2019
- 2018
- 2017
- 2016
- 2015
- 2014
- 2013
- 2012
- 2011
- 2010
- 2009
- 2008
- 2007
- 2006
- 2005
- 2004
- 2003
- 2002
- 2001
- 2000
- 1999
- 1998
- 1997
- 1996
- 1995
- 1994
- 1993
- 1992
- 1991
- 1990
- 1989
- 1988
- 1987
- 1986
- 1985
- 1984
- 1983
- 1982
- 1981
- 1980

---

(1) When did you END this job/work for pay/salary?  
MONTH

- January
- February
- March
- April
- May
- June
- July
- August
- September
- October
- November
- December
- Don't know

---

(1) When did you END this job/work for pay/salary?  
YEAR

- 2019
- 2018
- 2017
- 2016
- 2015
- 2014
- 2013
- 2012
- 2011
- 2010
- 2009
- 2008
- 2007
- 2006
- 2005
- 2004
- 2003
- 2002
- 2001
- 2000
- 1999
- 1998
- 1997
- 1996
- 1995
- 1994
- 1993
- 1992
- 1991
- 1990
- 1989
- 1988
- 1987
- 1986
- 1985
- 1984
- 1983
- 1982
- 1981
- 1980

(2) What was your main formal/informal occupation?

- None
  - Farm work
  - Domestic work
  - Construction work
  - Security work
  - Cleaning work
  - Small business owner
  - Mine work
  - Teacher
  - Traditional healer
  - Health sector (formal)
  - Game farm/game reserve (e.g. ranger)
  - Driver
  - Skilled worker (e.g. plumber, mechanic, electrician)
  - Cook/ chef/ catering
  - Unskilled worker (e.g. general labourer)
  - Artisan (e.g. carpenter, wood carver, weaver)
  - Waiter/ barman
  - Informal selling
  - Small business assistant
  - Clerical and office work
  - Cattle herder
  - Sewing, hairdressing, baking, brewing
  - Police, soldier, fireman
  - Petrol attendant
  - Timber, sawmill, poles
  - Gardening services
  - Fieldworker - NGO or university
  - Art, craft, photography, fashion design
  - Senior administrator, manager, professional
  - Priest/pastor
  - Retail/clerk/sales
  - Other
  - Don't know
- ( If unsure of how to classify, select "Other" )

(2) Please specify

\_\_\_\_\_

(2) When did you START this job/work for pay/salary?  
MONTH

- January
- February
- March
- April
- May
- June
- July
- August
- September
- October
- November
- December
- Don't know

---

(2) When did you START this job/work for pay/salary?  
YEAR

- 2019
- 2018
- 2017
- 2016
- 2015
- 2014
- 2013
- 2012
- 2011
- 2010
- 2009
- 2008
- 2007
- 2006
- 2005
- 2004
- 2003
- 2002
- 2001
- 2000
- 1999
- 1998
- 1997
- 1996
- 1995
- 1994
- 1993
- 1992
- 1991
- 1990
- 1989
- 1988
- 1987
- 1986
- 1985
- 1984
- 1983
- 1982
- 1981
- 1980

---

(2) When did you END this job/work for pay/salary?  
MONTH

- January
- February
- March
- April
- May
- June
- July
- August
- September
- October
- November
- December
- Don't know

---

(2) When did you END this job/work for pay/salary?  
YEAR

- 2019
- 2018
- 2017
- 2016
- 2015
- 2014
- 2013
- 2012
- 2011
- 2010
- 2009
- 2008
- 2007
- 2006
- 2005
- 2004
- 2003
- 2002
- 2001
- 2000
- 1999
- 1998
- 1997
- 1996
- 1995
- 1994
- 1993
- 1992
- 1991
- 1990
- 1989
- 1988
- 1987
- 1986
- 1985
- 1984
- 1983
- 1982
- 1981
- 1980



(3) What was your main formal/informal occupation?

- None
  - Farm work
  - Domestic work
  - Construction work
  - Security work
  - Cleaning work
  - Small business owner
  - Mine work
  - Teacher
  - Traditional healer
  - Health sector (formal)
  - Game farm/game reserve (e.g. ranger)
  - Driver
  - Skilled worker (e.g. plumber, mechanic, electrician)
  - Cook/ chef/ catering
  - Unskilled worker (e.g. general labourer)
  - Artisan (e.g. carpenter, wood carver, weaver)
  - Waiter/ barman
  - Informal selling
  - Small business assistant
  - Clerical and office work
  - Cattle herder
  - Sewing, hairdressing, baking, brewing
  - Police, soldier, fireman
  - Petrol attendant
  - Timber, sawmill, poles
  - Gardening services
  - Fieldworker - NGO or university
  - Art, craft, photography, fashion design
  - Senior administrator, manager, professional
  - Priest/pastor
  - Retail/clerk/sales
  - Other
  - Don't know
- ( If unsure of how to classify, select "Other" )

(3) Please specify \_\_\_\_\_

(3) When did you START this job/work for pay/salary?  
MONTH

- January
- February
- March
- April
- May
- June
- July
- August
- September
- October
- November
- December
- Don't know

---

(3) When did you START this job/work for pay/salary?  
YEAR

- 2019
- 2018
- 2017
- 2016
- 2015
- 2014
- 2013
- 2012
- 2011
- 2010
- 2009
- 2008
- 2007
- 2006
- 2005
- 2004
- 2003
- 2002
- 2001
- 2000
- 1999
- 1998
- 1997
- 1996
- 1995
- 1994
- 1993
- 1992
- 1991
- 1990
- 1989
- 1988
- 1987
- 1986
- 1985
- 1984
- 1983
- 1982
- 1981
- 1980

---

(3) When did you END this job/work for pay/salary?  
MONTH

- January
- February
- March
- April
- May
- June
- July
- August
- September
- October
- November
- December
- Don't know

---

(3) When did you END this job/work for pay/salary?  
YEAR

- 2019
- 2018
- 2017
- 2016
- 2015
- 2014
- 2013
- 2012
- 2011
- 2010
- 2009
- 2008
- 2007
- 2006
- 2005
- 2004
- 2003
- 2002
- 2001
- 2000
- 1999
- 1998
- 1997
- 1996
- 1995
- 1994
- 1993
- 1992
- 1991
- 1990
- 1989
- 1988
- 1987
- 1986
- 1985
- 1984
- 1983
- 1982
- 1981
- 1980

(4) What was your main formal/informal occupation?

- None
  - Farm work
  - Domestic work
  - Construction work
  - Security work
  - Cleaning work
  - Small business owner
  - Mine work
  - Teacher
  - Traditional healer
  - Health sector (formal)
  - Game farm/game reserve (e.g. ranger)
  - Driver
  - Skilled worker (e.g. plumber, mechanic, electrician)
  - Cook/ chef/ catering
  - Unskilled worker (e.g. general labourer)
  - Artisan (e.g. carpenter, wood carver, weaver)
  - Waiter/ barman
  - Informal selling
  - Small business assistant
  - Clerical and office work
  - Cattle herder
  - Sewing, hairdressing, baking, brewing
  - Police, soldier, fireman
  - Petrol attendant
  - Timber, sawmill, poles
  - Gardening services
  - Fieldworker - NGO or university
  - Art, craft, photography, fashion design
  - Senior administrator, manager, professional
  - Priest/pastor
  - Retail/clerk/sales
  - Other
  - Don't know
- ( If unsure of how to classify, select "Other" )

(4) Please specify \_\_\_\_\_

(4) When did you START this job/work for pay/salary?  
MONTH

- January
- February
- March
- April
- May
- June
- July
- August
- September
- October
- November
- December
- Don't know

---

(4) When did you START this job/work for pay/salary?  
YEAR

- 2019
- 2018
- 2017
- 2016
- 2015
- 2014
- 2013
- 2012
- 2011
- 2010
- 2009
- 2008
- 2007
- 2006
- 2005
- 2004
- 2003
- 2002
- 2001
- 2000
- 1999
- 1998
- 1997
- 1996
- 1995
- 1994
- 1993
- 1992
- 1991
- 1990
- 1989
- 1988
- 1987
- 1986
- 1985
- 1984
- 1983
- 1982
- 1981
- 1980

---

(4) When did you END this job/work for pay/salary?  
MONTH

- January
- February
- March
- April
- May
- June
- July
- August
- September
- October
- November
- December
- Don't know

---

(4) When did you END this job/work for pay/salary?  
YEAR

- 2019
- 2018
- 2017
- 2016
- 2015
- 2014
- 2013
- 2012
- 2011
- 2010
- 2009
- 2008
- 2007
- 2006
- 2005
- 2004
- 2003
- 2002
- 2001
- 2000
- 1999
- 1998
- 1997
- 1996
- 1995
- 1994
- 1993
- 1992
- 1991
- 1990
- 1989
- 1988
- 1987
- 1986
- 1985
- 1984
- 1983
- 1982
- 1981
- 1980

(5) What was your main formal/informal occupation?

- None
  - Farm work
  - Domestic work
  - Construction work
  - Security work
  - Cleaning work
  - Small business owner
  - Mine work
  - Teacher
  - Traditional healer
  - Health sector (formal)
  - Game farm/game reserve (e.g. ranger)
  - Driver
  - Skilled worker (e.g. plumber, mechanic, electrician)
  - Cook/ chef/ catering
  - Unskilled worker (e.g. general labourer)
  - Artisan (e.g. carpenter, wood carver, weaver)
  - Waiter/ barman
  - Informal selling
  - Small business assistant
  - Clerical and office work
  - Cattle herder
  - Sewing, hairdressing, baking, brewing
  - Police, soldier, fireman
  - Petrol attendant
  - Timber, sawmill, poles
  - Gardening services
  - Fieldworker - NGO or university
  - Art, craft, photography, fashion design
  - Senior administrator, manager, professional
  - Priest/pastor
  - Retail/clerk/sales
  - Other
  - Don't know
- ( If unsure of how to classify, select "Other" )

(5) Please specify \_\_\_\_\_

(5) When did you START this job/work for pay/salary?  
MONTH

- January
- February
- March
- April
- May
- June
- July
- August
- September
- October
- November
- December
- Don't know

---

(5) When did you START this job/work for pay/salary?  
YEAR

- 2019
- 2018
- 2017
- 2016
- 2015
- 2014
- 2013
- 2012
- 2011
- 2010
- 2009
- 2008
- 2007
- 2006
- 2005
- 2004
- 2003
- 2002
- 2001
- 2000
- 1999
- 1998
- 1997
- 1996
- 1995
- 1994
- 1993
- 1992
- 1991
- 1990
- 1989
- 1988
- 1987
- 1986
- 1985
- 1984
- 1983
- 1982
- 1981
- 1980

---

(5) When did you END this job/work for pay/salary?  
MONTH

- January
- February
- March
- April
- May
- June
- July
- August
- September
- October
- November
- December
- Don't know



---

(5) When did you END this job/work for pay/salary?  
YEAR

- 2019
- 2018
- 2017
- 2016
- 2015
- 2014
- 2013
- 2012
- 2011
- 2010
- 2009
- 2008
- 2007
- 2006
- 2005
- 2004
- 2003
- 2002
- 2001
- 2000
- 1999
- 1998
- 1997
- 1996
- 1995
- 1994
- 1993
- 1992
- 1991
- 1990
- 1989
- 1988
- 1987
- 1986
- 1985
- 1984
- 1983
- 1982
- 1981
- 1980

---

When you've completed [q\_6\_2] loops, select "Save and go to next instrument"

# Residence History Loop

---

## RESIDENCE HISTORY LOOP

Not including your current residence or your origin location/home village, begin with your previous place of residence and repeat for each of the [q\_6\_10] move(s) you made since you were 15

What province?

- Mpumalanga
- Gauteng
- Limpopo
- Free State
- KwaZulu Natal
- Eastern Cape
- Western Cape
- Northern Cape
- North West
- Other

Please specify:

---

Where within Mpumalanga?

- Agincourt study site
- Barberton
- Bushbuckridge
- Dwarsloop
- Game park Mpumalanga
- Gemu / Hazyview
- Graskop/ Pilgrim's rest
- Kangwane (former homeland)
- Kiepersol
- Komatipoort
- Machadodorp
- Malelane
- Mapulaneng / Bushbuckridge
- Marite / Alexandria
- Matsulu
- Middleburg
- Mkhuhlu
- Nelspruit
- Pienaar (Nelspruit)
- Sabie
- Thulamahashe
- White River
- Witbank
- Zwelitsha
- Other Mpumalanga
- Don't know

Please specify:

---

---

Where within Gauteng

- Akasia
- Alberton
- Alexandra
- Atteridgeville
- Babelegi
- Bapsfontein
- Bashewa
- Baviaanspoort
- Bekkersdal
- Benoni
- Bhongweni
- Blue Hills
- Boipatong
- Boksburg
- Bon Accord
- Bonamanzi Marina and Country Club
- Bopelong
- Boschkop
- Bosplaas Mathabe
- Bothasgeluk
- Brakpan
- Breswol
- Bronkhorstspuit
- Bultfontein
- Carletonville
- Centurion
- Chartwell
- Cheetah Park
- Chief A Luthuli Park
- City of Johannesburg NU
- Clayville
- Cullinan
- Dainfern
- Daveyton
- Deelkraal Gold Mine
- Derdepoort
- Devon A
- Devon B
- Diepsloot
- Diloppe
- Donkerhoek
- Doornfontein
- Doornkraal
- Downbern
- Drie Ziek
- Duduza
- Dukathole
- East Driefontein
- East Village
- Ebony Park
- Edenvale
- Eersterust
- Ekangala
- Ekurhuleni NU
- Elandsfontein
- Elandsrand
- Elandsridge
- Elsburg Gold Mine
- Emfuleni NU
- Endicott
- Ennerdale
- Etwatwa
- Evaton
- Farmall
- Fochville
- Ga-Rankuwa
- Geluksdal
- Germiston
- Glen Harvie

- Golden Gardens
- Goudvlakte West
- Green Park
- Grootfontein
- Grootvlei
- Haakdoornboom
- Hallgate
- Hammanskraal
- Harry Gwala
- Hartebeesfontein
- Hebron
- Heidelberg
- Hillshaven
- Holfontein
- Impumelelo
- Itsoseng
- Ivory Park
- Johandeo
- Johannesburg
- Kaalfontein
- Kagiso
- Kameeldrift
- Kameelfontein
- Kameelkraal
- Kanana
- Kanana Park
- Katlehong
- Other
- Keinfontein
- Kekana Garden
- Kempton Park
- Khutsong
- Kleinfontein
- Kokosi
- Krugersdorp
- Kungwini Part 2
- Kwa-Thema
- Lakeside
- Langaville
- Lanseria
- Laudium
- Lawley
- Leeufontein
- Leeuport
- Lehae
- Lenasia
- Lenasia South
- Lenz
- Lesedi NU
- Letsatsing
- Lindelani Village
- Lucky 7
- Mabopane
- Magaliesburg
- Majaneng
- Makanyaneng
- Malatjie
- Mamello
- Mamelodi
- Mandela Village
- Marokolong
- Mashemong
- Mayibuye
- Merafong City NU
- Meyerton
- Midrand
- Midvaal NU
- Millgate Farm
- Mogale City NU
- Mhlakeng
- Mooiplaas

- Munsieville
- Nellmapius
- New Eersterus
- Nigel
- Nooitgecht
- Nufcor
- Oberholzer
- Olievenhoutbos
- Onverwacht
- Orange Farm
- Orient Hills
- Pebble Rock Golf Village
- Phomolong
- Poortjie
- Pretoria
- Rabie Ridge
- Ramotse
- Randburg
- Randfontein
- Randfontein NU
- Randvaal
- Ratanda
- Rayton
- Refilwe
- Rethabiseng
- Rietfontein
- Rietvallei
- Roodeplaat
- Roodepoort
- Sable Hills Waterfront Estate
- Sandton
- Saulsville
- Seberuberung
- Sebokeng
- Sharpeville
- Simunye
- Sonstraal
- Soshanguve
- Southdene
- Soutpan
- Soweto
- Spaarwater
- Springs
- Stinkwater
- Stretford
- Suurman
- Temba
- Tembisa
- The Carousel Casino and Entertainment World
- The Hill
- The Village
- Thembisile
- Thinasonke
- Tierpoort
- Tokoza
- Tsakane
- Tsebe
- Tshepiso
- Tshepisong
- Tshwane NU
- Tweedracht
- Tweefontein
- Vaal Marina
- Vaal Oewer
- Vaalbank
- Vanderbijlpark
- Vastfontein
- Venterspost
- Vereeniging
- Viskuil
- Vlakfontein

- Vosloorus
- Wageenbietjieskop
- Walkerville
- Wallis Haven
- Wallmannsthal
- Waterpan
- Waterval
- Waterworks
- Wattville
- Wedela
- Welperdiend
- West Village
- West-Driefontein
- Western Areas Gold Mine
- Western Deep Levels Mine
- Westonaria
- Westonaria NU
- Winterveld
- Wolwekrans
- Zakariyya Park
- Zenzele
- Zevenfontein
- Zithobeni
- Zwartkop
- Zwavelpoort

---

Please specify:

---

---

Where within Limpopo?

- Aganang
- Ba-Phalaborwa
- Bela-Bela
- Blouberg
- Elias Motsoaledi
- Fetakgomo
- Greater Giyani
- Greater Letaba
- Greater Marble Hall
- Greater Tubatse
- Greater Tzaneen
- Lepelle-Nkumpi
- Lephhalale
- Makhado
- Makhuduthamaga
- Malamulele
- Maruleng
- Modimolle
- Mogalakwena
- Molemole
- Mookgopong
- Musina
- Polokwane
- Thabazimbi
- Thulamela
- Other
- Don't know

---

Please specify:

---

---

Where within Western Cape?

---

---

Where within Eastern Cape?

---

---

Where within North West?

---

---

Where within KwaZulu Natal?

---

---

Where within Northern Cape?

---

---

Where within Free State?

---

---

(1) Was it rural or urban?

- Rural
  - Urban (city or town)
  - Don't know
- (Rural meaning locations like villages, agricultural areas, or game farms)

---

(1) When did you start living there? MONTH

- January
- February
- March
- April
- May
- June
- July
- August
- September
- October
- November
- December
- Don't know

---

(1) When did you start living there? YEAR

- 2019
- 2018
- 2017
- 2016
- 2015
- 2014
- 2013
- 2012
- 2011
- 2010
- 2009
- 2008
- 2007
- 2006
- 2005
- 2004
- 2003
- 2002
- 2001
- 2000
- 1999
- 1998
- 1997
- 1996
- 1995
- 1994
- 1993
- 1992
- 1991
- 1990
- 1989
- 1988
- 1987
- 1986
- 1985
- 1984
- 1983
- 1982
- 1981
- 1980
- Don't Know



---

(1) What was your main reason for moving to this place of residence?

- Job assignment/transfer
- Retrenchment
- Better employment opportunities
- Better accommodation prospects
- Better educational/training opportunities
- Closer to school or work
- Better public/social services
- Moved with family
- Joined family or friends
- Marriage
- Divorce
- Death of a family member
- Family responsibility
- Attraction to urban life style
- Evicted from previous residence
- Not able to pay rent
- Government resettlement
- Left to escape violence
- Other (specify)
- Dont know

---

(1) Please specify

\_\_\_\_\_

---

(1) What was your main formal/informal occupation in the month BEFORE you moved?

- None
  - Farm work
  - Domestic work
  - Construction work
  - Security work
  - Cleaning work
  - Small business owner
  - Mine work
  - Teacher
  - Traditional healer
  - Health sector (formal)
  - Game farm/game reserve (e.g. ranger)
  - Driver
  - Skilled worker (e.g. plumber, mechanic, electrician)
  - Cook/ chef/ catering
  - Unskilled worker (e.g. general labourer)
  - Artisan (e.g. carpenter, wood carver, weaver)
  - Waiter/ barman
  - Informal selling
  - Small business assistant
  - Clerical and office work
  - Cattle herder
  - Sewing, hairdressing, baking, brewing
  - Police, soldier, fireman
  - Petrol attendant
  - Timber, sawmill, poles
  - Gardening services
  - Fieldworker - NGO or university
  - Art, craft, photography, fashion design
  - Senior administrator, manager, professional
  - Priest/pastor
  - Retail/clerk/sales
  - Student
  - Other
  - Don't know
- ( If unsure of how to classify, select "Other" )

---

(1) Please specify

---

(1) What was your main formal/informal occupation in the month AFTER you moved?

- None
  - Farm work
  - Domestic work
  - Construction work
  - Security work
  - Cleaning work
  - Small business owner
  - Mine work
  - Teacher
  - Traditional healer
  - Health sector (formal)
  - Game farm/game reserve (e.g. ranger)
  - Driver
  - Skilled worker (e.g. plumber, mechanic, electrician)
  - Cook/ chef/ catering
  - Unskilled worker (e.g. general labourer)
  - Artisan (e.g. carpenter, wood carver, weaver)
  - Waiter/ barman
  - Informal selling
  - Small business assistant
  - Clerical and office work
  - Cattle herder
  - Sewing, hairdressing, baking, brewing
  - Police, soldier, fireman
  - Petrol attendant
  - Timber, sawmill, poles
  - Gardening services
  - Fieldworker - NGO or university
  - Art, craft, photography, fashion design
  - Senior administrator, manager, professional
  - Priest/pastor
  - Retail/clerk/sales
  - Student
  - Other
  - Don't know
- ( If unsure of how to classify, select "Other" )

(1) Please specify

---

(1) In what type of place did you live?

- Commercial farm
- Game farm/nature reserve
- Mine
- Military base
- City (inner)
- City (suburb)
- Town
- Village (trust land)
- Informal settlement (city)
- Informal settlement (rural)
- Township (urban)
- Township (rural)
- Other
- Don't know

(1) Please specify

---

---

(1) What type of dwelling did you live in?

- House, brick or concrete structure on a separate stand
- Traditional dwelling, hut or structure made of traditional materials
- Flat or apartment in a block of flats/complex
- Cluster house in a complex
- Townhouse
- Semi-detached house not in a complex
- House, flat or room separate from main dwelling in backyard
- Informal dwelling or shack in backyard
- Informal dwelling NOT in backyard, e.g. in informal squatter settlement or on a farm
- Room or flat which is part of main dwelling or property
- Caravan or tent
- Unit in a retirement home or barracks etc.
- Other
- Don't know

---

(1) Please specify

\_\_\_\_\_

---

(1) With?whom did you live at this residence?

- Parent(s)
- Spouse/partner/boyfriend/girlfriend
- Spouse and children
- Parent(s) in-law
- Friends
- Relatives
- Countrymen
- Alone
- Second family
- Other
- Don't know

---

(1) Please specify

\_\_\_\_\_

---

(1) When did you stop living there? MONTH

- January
- February
- March
- April
- May
- June
- July
- August
- September
- October
- November
- December
- Don't know

---

(1) When did you stop living there? YEAR

- 2019
- 2018
- 2017
- 2016
- 2015
- 2014
- 2013
- 2012
- 2011
- 2010
- 2009
- 2008
- 2007
- 2006
- 2005
- 2004
- 2003
- 2002
- 2001
- 2000
- 1999
- 1998
- 1997
- 1996
- 1995
- 1994
- 1993
- 1992
- 1991
- 1990
- 1989
- 1988
- 1987
- 1986
- 1985
- 1984
- 1983
- 1982
- 1981
- 1980
- Don't Know

---

The following questions are for the place you lived before that

---

What province?

- Mpumalanga
- Gauteng
- Limpopo
- Free State
- KwaZulu Natal
- Eastern Cape
- Western Cape
- Northern Cape
- North West
- Other

---

Please specify:

---

---

Where within Mpumalanga?

- Agincourt study site
- Barberton
- Bushbuckridge
- Dwarsloop
- Game park Mpumalanga
- Gemu / Hazyview
- Graskop/ Pilgrim's rest
- Kangwane (former homeland)
- Kiepersol
- Komatipoort
- Machadodorp
- Malelane
- Mapulaneng / Bushbuckridge
- Marite / Alexandria
- Matsulu
- Middleburg
- Mkhuhlu
- Nelspruit
- Pienaar (Nelspruit)
- Sabie
- Thulamahashe
- White River
- Witbank
- Zwelitsha
- Other Mpumalanga
- Don't know

---

Please specify:

---

---

Where within Gauteng

- Akasia
- Alberton
- Alexandra
- Atteridgeville
- Babelegi
- Bapsfontein
- Bashewa
- Baviaanspoort
- Bekkersdal
- Benoni
- Bhongweni
- Blue Hills
- Boipatong
- Boksburg
- Bon Accord
- Bonamanzi Marina and Country Club
- Bopelong
- Boschkop
- Bosplaas Mathabe
- Bothasgeluk
- Brakpan
- Breswol
- Bronkhorstspuit
- Bultfontein
- Carletonville
- Centurion
- Chartwell
- Cheetah Park
- Chief A Luthuli Park
- City of Johannesburg NU
- Clayville
- Cullinan
- Dainfern
- Daveyton
- Deelkraal Gold Mine
- Derdepoort
- Devon A
- Devon B
- Diepsloot
- Diloppe
- Donkerhoek
- Doornfontein
- Doornkraal
- Downbern
- Drie Ziek
- Duduza
- Dukathole
- East Driefontein
- East Village
- Ebony Park
- Edenvale
- Eersterust
- Ekangala
- Ekurhuleni NU
- Elandsfontein
- Elandsrand
- Elandsridge
- Elsburg Gold Mine
- Emfuleni NU
- Endicott
- Ennerdale
- Etwatwa
- Evaton
- Farmall
- Fochville
- Ga-Rankuwa
- Geluksdal
- Germiston
- Glen Harvie

- Golden Gardens
- Goudvlakte West
- Green Park
- Grootfontein
- Grootvlei
- Haakdoornboom
- Hallgate
- Hammanskraal
- Harry Gwala
- Hartebeesfontein
- Hebron
- Heidelberg
- Hillshaven
- Holfontein
- Impumelelo
- Itsoseng
- Ivory Park
- Johandeo
- Johannesburg
- Kaalfontein
- Kagiso
- Kameeldrift
- Kameelfontein
- Kameelkraal
- Kanana
- Kanana Park
- Katlehong
- Other
- Keinfontein
- Kekana Garden
- Kempton Park
- Khutsong
- Kleinfontein
- Kokosi
- Krugersdorp
- Kungwini Part 2
- Kwa-Thema
- Lakeside
- Langaville
- Lanseria
- Laudium
- Lawley
- Leeufontein
- Leeuport
- Lehae
- Lenasia
- Lenasia South
- Lenz
- Lesedi NU
- Letsatsing
- Lindelani Village
- Lucky 7
- Mabopane
- Magaliesburg
- Majaneng
- Makanyaneng
- Malatjie
- Mamello
- Mamelodi
- Mandela Village
- Marokolong
- Mashemong
- Mayibuye
- Merafong City NU
- Meyerton
- Midrand
- Midvaal NU
- Millgate Farm
- Mogale City NU
- Mhlakeng
- Mooiplaas



- Munsieville
- Nellmapius
- New Eersterus
- Nigel
- Nooitgecht
- Nufcor
- Oberholzer
- Olievenhoutbos
- Onverwacht
- Orange Farm
- Orient Hills
- Pebble Rock Golf Village
- Phomolong
- Poortjie
- Pretoria
- Rabie Ridge
- Ramotse
- Randburg
- Randfontein
- Randfontein NU
- Randvaal
- Ratanda
- Rayton
- Refilwe
- Rethabiseng
- Rietfontein
- Rietvallei
- Roodeplaat
- Roodepoort
- Sable Hills Waterfront Estate
- Sandton
- Saulsville
- Seberuberung
- Sebokeng
- Sharpeville
- Simunye
- Sonstraal
- Soshanguve
- Southdene
- Soutpan
- Soweto
- Spaarwater
- Springs
- Stinkwater
- Stretford
- Suurman
- Temba
- Tembisa
- The Carousel Casino and Entertainment World
- The Hill
- The Village
- Thembisile
- Thinasonke
- Tierpoort
- Tokoza
- Tsakane
- Tsebe
- Tshepiso
- Tshepisong
- Tshwane NU
- Tweedracht
- Tweefontein
- Vaal Marina
- Vaal Oewer
- Vaalbank
- Vanderbijlpark
- Vastfontein
- Venterspost
- Vereeniging
- Viskuil
- Vlakfontein

- Vosloorus
- Wageenbietjieskop
- Walkerville
- Wallis Haven
- Wallmannsthal
- Waterpan
- Waterval
- Waterworks
- Wattville
- Wedela
- Welperdiend
- West Village
- West-Driefontein
- Western Areas Gold Mine
- Western Deep Levels Mine
- Westonaria
- Westonaria NU
- Winterveld
- Wolwekrans
- Zakariyya Park
- Zenzele
- Zevenfontein
- Zithobeni
- Zwartkop
- Zwavelpoort

---

Please specify:

---

---

Where within Limpopo?

- Aganang
- Ba-Phalaborwa
- Bela-Bela
- Blouberg
- Elias Motsoaledi
- Fetakgomo
- Greater Giyani
- Greater Letaba
- Greater Marble Hall
- Greater Tubatse
- Greater Tzaneen
- Lepelle-Nkumpi
- Lephhalale
- Makhado
- Makhuduthamaga
- Malamulele
- Maruleng
- Modimolle
- Mogalakwena
- Molemole
- Mookgopong
- Musina
- Polokwane
- Thabazimbi
- Thulamela
- Other
- Don't know

---

Please specify:

---

---

Where within Western Cape?

---

---

Where within Eastern Cape?

---

---

Where within North West?

---

---

Where within KwaZulu Natal?

---

---

Where within Northern Cape?

---

---

Where within Free State?

---

---

(2) Was it rural or urban?

- Rural
  - Urban (city or town)
  - Don't know
- (Rural meaning locations like villages, agricultural areas, or game farms)

---

(2) When did you start living there? MONTH

- January
- February
- March
- April
- May
- June
- July
- August
- September
- October
- November
- December
- Don't know

---

(2) When did you start living there? YEAR

- 2019
- 2018
- 2017
- 2016
- 2015
- 2014
- 2013
- 2012
- 2011
- 2010
- 2009
- 2008
- 2007
- 2006
- 2005
- 2004
- 2003
- 2002
- 2001
- 2000
- 1999
- 1998
- 1997
- 1996
- 1995
- 1994
- 1993
- 1992
- 1991
- 1990
- 1989
- 1988
- 1987
- 1986
- 1985
- 1984
- 1983
- 1982
- 1981
- 1980
- Don't Know

---

(2) What was your main reason for moving to this place of residence?

- Job assignment/transfer
- Retrenchment
- Better employment opportunities
- Better accommodation prospects
- Better educational/training opportunities
- Closer to school or work
- Better public/social services
- Moved with family
- Joined family or friends
- Marriage
- Divorce
- Death of a family member
- Family responsibility
- Attraction to urban life style
- Evicted from previous residence
- Not able to pay rent
- Government resettlement
- Left to escape violence
- Other (specify)
- Dont know

---

(2) Please specify

---

---

(2) What was your main formal/informal occupation in the month BEFORE you moved?

- None
  - Farm work
  - Domestic work
  - Construction work
  - Security work
  - Cleaning work
  - Small business owner
  - Mine work
  - Teacher
  - Traditional healer
  - Health sector (formal)
  - Game farm/game reserve (e.g. ranger)
  - Driver
  - Skilled worker (e.g. plumber, mechanic, electrician)
  - Cook/ chef/ catering
  - Unskilled worker (e.g. general labourer)
  - Artisan (e.g. carpenter, wood carver, weaver)
  - Waiter/ barman
  - Informal selling
  - Small business assistant
  - Clerical and office work
  - Cattle herder
  - Sewing, hairdressing, baking, brewing
  - Police, soldier, fireman
  - Petrol attendant
  - Timber, sawmill, poles
  - Gardening services
  - Fieldworker - NGO or university
  - Art, craft, photography, fashion design
  - Senior administrator, manager, professional
  - Priest/pastor
  - Retail/clerk/sales
  - Student
  - Other
  - Don't know
- ( If unsure of how to classify, select "Other" )

---

(2) Please specify

---

(2) What was your main formal/informal occupation in the month AFTER you moved?

- None
  - Farm work
  - Domestic work
  - Construction work
  - Security work
  - Cleaning work
  - Small business owner
  - Mine work
  - Teacher
  - Traditional healer
  - Health sector (formal)
  - Game farm/game reserve (e.g. ranger)
  - Driver
  - Skilled worker (e.g. plumber, mechanic, electrician)
  - Cook/ chef/ catering
  - Unskilled worker (e.g. general labourer)
  - Artisan (e.g. carpenter, wood carver, weaver)
  - Waiter/ barman
  - Informal selling
  - Small business assistant
  - Clerical and office work
  - Cattle herder
  - Sewing, hairdressing, baking, brewing
  - Police, soldier, fireman
  - Petrol attendant
  - Timber, sawmill, poles
  - Gardening services
  - Fieldworker - NGO or university
  - Art, craft, photography, fashion design
  - Senior administrator, manager, professional
  - Priest/pastor
  - Retail/clerk/sales
  - Student
  - Other
  - Don't know
- ( If unsure of how to classify, select "Other" )

(2) Please specify

---

(2) In what type of place did you live?

- Commercial farm
- Game farm/nature reserve
- Mine
- Military base
- City (inner)
- City (suburb)
- Town
- Village (trust land)
- Informal settlement (city)
- Informal settlement (rural)
- Township (urban)
- Township (rural)
- Other
- Don't know

(2) Please specify

---

---

(2) What type of dwelling did you live in?

- House, brick or concrete structure on a separate stand
- Traditional dwelling, hut or structure made of traditional materials
- Flat or apartment in a block of flats/complex
- Cluster house in a complex
- Townhouse
- Semi-detached house not in a complex
- House, flat or room separate from main dwelling in backyard
- Informal dwelling or shack in backyard
- Informal dwelling NOT in backyard, e.g. in informal squatter settlement or on a farm
- Room or flat which is part of main dwelling or property
- Caravan or tent
- Unit in a retirement home or barracks etc.
- Other
- Don't know

---

(2) Please specify

\_\_\_\_\_

---

(2) With?whom did you live at this residence?

- Parent(s)
- Spouse/partner/boyfriend/girlfriend
- Spouse and children
- Parent(s) in-law
- Friends
- Relatives
- Countrymen
- Alone
- Second family
- Other
- Don't know

---

(2) Please specify

\_\_\_\_\_

---

(2) When did you stop living there? MONTH

- January
- February
- March
- April
- May
- June
- July
- August
- September
- October
- November
- December
- Don't know



---

(2) When did you stop living there? YEAR

- 2019
- 2018
- 2017
- 2016
- 2015
- 2014
- 2013
- 2012
- 2011
- 2010
- 2009
- 2008
- 2007
- 2006
- 2005
- 2004
- 2003
- 2002
- 2001
- 2000
- 1999
- 1998
- 1997
- 1996
- 1995
- 1994
- 1993
- 1992
- 1991
- 1990
- 1989
- 1988
- 1987
- 1986
- 1985
- 1984
- 1983
- 1982
- 1981
- 1980
- Don't Know

---

The following questions are for the place you lived before that

---

What province?

- Mpumalanga
- Gauteng
- Limpopo
- Free State
- KwaZulu Natal
- Eastern Cape
- Western Cape
- Northern Cape
- North West
- Other

---

Please specify:

---

---

Where within Mpumalanga?

- Agincourt study site
- Barberton
- Bushbuckridge
- Dwarsloop
- Game park Mpumalanga
- Gemu / Hazyview
- Graskop/ Pilgrim's rest
- Kangwane (former homeland)
- Kiepersol
- Komatipoort
- Machadodorp
- Malelane
- Mapulaneng / Bushbuckridge
- Marite / Alexandria
- Matsulu
- Middleburg
- Mkhuhlu
- Nelspruit
- Pienaar (Nelspruit)
- Sabie
- Thulamahashe
- White River
- Witbank
- Zwelitsha
- Other Mpumalanga
- Don't know

---

Please specify:

---

---

Where within Gauteng

- Akasia
- Alberton
- Alexandra
- Atteridgeville
- Babelegi
- Bapsfontein
- Bashewa
- Baviaanspoort
- Bekkersdal
- Benoni
- Bhongweni
- Blue Hills
- Boipatong
- Boksburg
- Bon Accord
- Bonamanzi Marina and Country Club
- Bopelong
- Boschkop
- Bosplaas Mathabe
- Bothasgeluk
- Brakpan
- Breswol
- Bronkhorstspuit
- Bultfontein
- Carletonville
- Centurion
- Chartwell
- Cheetah Park
- Chief A Luthuli Park
- City of Johannesburg NU
- Clayville
- Cullinan
- Dainfern
- Daveyton
- Deelkraal Gold Mine
- Derdepoort
- Devon A
- Devon B
- Diepsloot
- Diloppe
- Donkerhoek
- Doornfontein
- Doornkraal
- Downbern
- Drie Ziek
- Duduza
- Dukathole
- East Driefontein
- East Village
- Ebony Park
- Edenvale
- Eersterust
- Ekangala
- Ekurhuleni NU
- Elandsfontein
- Elandsrand
- Elandsridge
- Elsburg Gold Mine
- Emfuleni NU
- Endicott
- Ennerdale
- Etwatwa
- Evaton
- Farmall
- Fochville
- Ga-Rankuwa
- Geluksdal
- Germiston
- Glen Harvie

- Golden Gardens
- Goudvlakte West
- Green Park
- Grootfontein
- Grootvlei
- Haakdoornboom
- Hallgate
- Hammanskraal
- Harry Gwala
- Hartebeesfontein
- Hebron
- Heidelberg
- Hillshaven
- Holfontein
- Impumelelo
- Itsoseng
- Ivory Park
- Johandeo
- Johannesburg
- Kaalfontein
- Kagiso
- Kameeldrift
- Kameelfontein
- Kameelkraal
- Kanana
- Kanana Park
- Katlehong
- Other
- Keinfontein
- Kekana Garden
- Kempton Park
- Khutsong
- Kleinfontein
- Kokosi
- Krugersdorp
- Kungwini Part 2
- Kwa-Thema
- Lakeside
- Langaville
- Lanseria
- Laudium
- Lawley
- Leeufontein
- Leeuport
- Lehae
- Lenasia
- Lenasia South
- Lenz
- Lesedi NU
- Letsatsing
- Lindelani Village
- Lucky 7
- Mabopane
- Magaliesburg
- Majaneng
- Makanyaneng
- Malatjie
- Mamello
- Mamelodi
- Mandela Village
- Marokolong
- Mashemong
- Mayibuye
- Merafong City NU
- Meyerton
- Midrand
- Midvaal NU
- Millgate Farm
- Mogale City NU
- Mhlakeng
- Mooiplaas

- Munsieville
- Nellmapius
- New Eersterus
- Nigel
- Nooitgecht
- Nufcor
- Oberholzer
- Olievenhoutbos
- Onverwacht
- Orange Farm
- Orient Hills
- Pebble Rock Golf Village
- Phomolong
- Poortjie
- Pretoria
- Rabie Ridge
- Ramotse
- Randburg
- Randfontein
- Randfontein NU
- Randvaal
- Ratanda
- Rayton
- Refilwe
- Rethabiseng
- Rietfontein
- Rietvallei
- Roodeplaat
- Roodepoort
- Sable Hills Waterfront Estate
- Sandton
- Saulsville
- Seberuberung
- Sebokeng
- Sharpeville
- Simunye
- Sonstraal
- Soshanguve
- Southdene
- Soutpan
- Soweto
- Spaarwater
- Springs
- Stinkwater
- Stretford
- Suurman
- Temba
- Tembisa
- The Carousel Casino and Entertainment World
- The Hill
- The Village
- Thembisile
- Thinasonke
- Tierpoort
- Tokoza
- Tsakane
- Tsebe
- Tshepiso
- Tshepisong
- Tshwane NU
- Tweedracht
- Tweefontein
- Vaal Marina
- Vaal Oewer
- Vaalbank
- Vanderbijlpark
- Vastfontein
- Venterspost
- Vereeniging
- Viskuil
- Vlakfontein

- Vosloorus
- Wageenbietjieskop
- Walkerville
- Wallis Haven
- Wallmannsthal
- Waterpan
- Waterval
- Waterworks
- Wattville
- Wedela
- Welperdiend
- West Village
- West-Driefontein
- Western Areas Gold Mine
- Western Deep Levels Mine
- Westonaria
- Westonaria NU
- Winterveld
- Wolwekrans
- Zakariyya Park
- Zenzele
- Zevenfontein
- Zithobeni
- Zwartkop
- Zwavelpoort

---

Please specify:

---



---

Where within Limpopo?

- Aganang
- Ba-Phalaborwa
- Bela-Bela
- Blouberg
- Elias Motsoaledi
- Fetakgomo
- Greater Giyani
- Greater Letaba
- Greater Marble Hall
- Greater Tubatse
- Greater Tzaneen
- Lepelle-Nkumpi
- Lephalale
- Makhado
- Makhuduthamaga
- Malamulele
- Maruleng
- Modimolle
- Mogalakwena
- Molemole
- Mookgopong
- Musina
- Polokwane
- Thabazimbi
- Thulamela
- Other
- Don't know

---

Please specify:

---



---

Where within Western Cape?

---

---

Where within Eastern Cape?

---

---

Where within North West?

---

---

Where within KwaZulu Natal?

---

---

Where within Northern Cape?

---

---

Where within Free State?

---

---

(3) Was it rural or urban?

- Rural
  - Urban (city or town)
  - Don't know
- (Rural meaning locations like villages, agricultural areas, or game farms)

---

(3) When did you start living there? MONTH

- January
- February
- March
- April
- May
- June
- July
- August
- September
- October
- November
- December
- Don't know

---

(3) When did you start living there? YEAR

- 2019
- 2018
- 2017
- 2016
- 2015
- 2014
- 2013
- 2012
- 2011
- 2010
- 2009
- 2008
- 2007
- 2006
- 2005
- 2004
- 2003
- 2002
- 2001
- 2000
- 1999
- 1998
- 1997
- 1996
- 1995
- 1994
- 1993
- 1992
- 1991
- 1990
- 1989
- 1988
- 1987
- 1986
- 1985
- 1984
- 1983
- 1982
- 1981
- 1980
- Don't Know



---

(3) What was your main reason for moving to this place of residence?

- Job assignment/transfer
- Retrenchment
- Better employment opportunities
- Better accommodation prospects
- Better educational/training opportunities
- Closer to school or work
- Better public/social services
- Moved with family
- Joined family or friends
- Marriage
- Divorce
- Death of a family member
- Family responsibility
- Attraction to urban life style
- Evicted from previous residence
- Not able to pay rent
- Government resettlement
- Left to escape violence
- Other (specify)
- Dont know

---

(3) Please specify

---

---

(3) What was your main formal/informal occupation in the month BEFORE you moved?

- None
  - Farm work
  - Domestic work
  - Construction work
  - Security work
  - Cleaning work
  - Small business owner
  - Mine work
  - Teacher
  - Traditional healer
  - Health sector (formal)
  - Game farm/game reserve (e.g. ranger)
  - Driver
  - Skilled worker (e.g. plumber, mechanic, electrician)
  - Cook/ chef/ catering
  - Unskilled worker (e.g. general labourer)
  - Artisan (e.g. carpenter, wood carver, weaver)
  - Waiter/ barman
  - Informal selling
  - Small business assistant
  - Clerical and office work
  - Cattle herder
  - Sewing, hairdressing, baking, brewing
  - Police, soldier, fireman
  - Petrol attendant
  - Timber, sawmill, poles
  - Gardening services
  - Fieldworker - NGO or university
  - Art, craft, photography, fashion design
  - Senior administrator, manager, professional
  - Priest/pastor
  - Retail/clerk/sales
  - Student
  - Other
  - Don't know
- ( If unsure of how to classify, select "Other" )

---

(3) Please specify

---

(3) What was your main formal/informal occupation in the month AFTER you moved?

- None
  - Farm work
  - Domestic work
  - Construction work
  - Security work
  - Cleaning work
  - Small business owner
  - Mine work
  - Teacher
  - Traditional healer
  - Health sector (formal)
  - Game farm/game reserve (e.g. ranger)
  - Driver
  - Skilled worker (e.g. plumber, mechanic, electrician)
  - Cook/ chef/ catering
  - Unskilled worker (e.g. general labourer)
  - Artisan (e.g. carpenter, wood carver, weaver)
  - Waiter/ barman
  - Informal selling
  - Small business assistant
  - Clerical and office work
  - Cattle herder
  - Sewing, hairdressing, baking, brewing
  - Police, soldier, fireman
  - Petrol attendant
  - Timber, sawmill, poles
  - Gardening services
  - Fieldworker - NGO or university
  - Art, craft, photography, fashion design
  - Senior administrator, manager, professional
  - Priest/pastor
  - Retail/clerk/sales
  - Student
  - Other
  - Don't know
- ( If unsure of how to classify, select "Other" )

(3) Please specify

---

(3) In what type of place did you live?

- Commercial farm
- Game farm/nature reserve
- Mine
- Military base
- City (inner)
- City (suburb)
- Town
- Village (trust land)
- Informal settlement (city)
- Informal settlement (rural)
- Township (urban)
- Township (rural)
- Other
- Don't know

(3) Please specify

---

---

(3) What type of dwelling did you live in?

- House, brick or concrete structure on a separate stand
- Traditional dwelling, hut or structure made of traditional materials
- Flat or apartment in a block of flats/complex
- Cluster house in a complex
- Townhouse
- Semi-detached house not in a complex
- House, flat or room separate from main dwelling in backyard
- Informal dwelling or shack in backyard
- Informal dwelling NOT in backyard, e.g. in informal squatter settlement or on a farm
- Room or flat which is part of main dwelling or property
- Caravan or tent
- Unit in a retirement home or barracks etc.
- Other
- Don't know

---

(3) Please specify

\_\_\_\_\_

---

(3) With?whom did you live at this residence?

- Parent(s)
- Spouse/partner/boyfriend/girlfriend
- Spouse and children
- Parent(s) in-law
- Friends
- Relatives
- Countrymen
- Alone
- Second family
- Other
- Don't know

---

(3) Please specify

\_\_\_\_\_

---

(3) When did you stop living there? MONTH

- January
- February
- March
- April
- May
- June
- July
- August
- September
- October
- November
- December
- Don't know

---

(3) When did you stop living there? YEAR

- 2019
- 2018
- 2017
- 2016
- 2015
- 2014
- 2013
- 2012
- 2011
- 2010
- 2009
- 2008
- 2007
- 2006
- 2005
- 2004
- 2003
- 2002
- 2001
- 2000
- 1999
- 1998
- 1997
- 1996
- 1995
- 1994
- 1993
- 1992
- 1991
- 1990
- 1989
- 1988
- 1987
- 1986
- 1985
- 1984
- 1983
- 1982
- 1981
- 1980
- Don't Know

---

The following questions are for the place you lived before that

---

What province?

- Mpumalanga
- Gauteng
- Limpopo
- Free State
- KwaZulu Natal
- Eastern Cape
- Western Cape
- Northern Cape
- North West
- Other

---

Please specify:

---

---

Where within Mpumalanga?

- Agincourt study site
- Barberton
- Bushbuckridge
- Dwarsloop
- Game park Mpumalanga
- Gemu / Hazyview
- Graskop/ Pilgrim's rest
- Kangwane (former homeland)
- Kiepersol
- Komatipoort
- Machadodorp
- Malelane
- Mapulaneng / Bushbuckridge
- Marite / Alexandria
- Matsulu
- Middleburg
- Mkhuhlu
- Nelspruit
- Pienaar (Nelspruit)
- Sabie
- Thulamahashe
- White River
- Witbank
- Zwelitsha
- Other Mpumalanga
- Don't know

---

Please specify:

---

---

Where within Gauteng

- Akasia
- Alberton
- Alexandra
- Atteridgeville
- Babelegi
- Bapsfontein
- Bashewa
- Baviaanspoort
- Bekkersdal
- Benoni
- Bhongweni
- Blue Hills
- Boipatong
- Boksburg
- Bon Accord
- Bonamanzi Marina and Country Club
- Bopelong
- Boschkop
- Bosplaas Mathabe
- Bothasgeluk
- Brakpan
- Breswol
- Bronkhorstspuit
- Bultfontein
- Carletonville
- Centurion
- Chartwell
- Cheetah Park
- Chief A Luthuli Park
- City of Johannesburg NU
- Clayville
- Cullinan
- Dainfern
- Daveyton
- Deelkraal Gold Mine
- Derdepoort
- Devon A
- Devon B
- Diepsloot
- Diloppe
- Donkerhoek
- Doornfontein
- Doornkraal
- Downbern
- Drie Ziek
- Duduza
- Dukathole
- East Driefontein
- East Village
- Ebony Park
- Edenvale
- Eersterust
- Ekangala
- Ekurhuleni NU
- Elandsfontein
- Elandsrand
- Elandsridge
- Elsburg Gold Mine
- Emfuleni NU
- Endicott
- Ennerdale
- Etwatwa
- Evaton
- Farmall
- Fochville
- Ga-Rankuwa
- Geluksdal
- Germiston
- Glen Harvie

- Golden Gardens
- Goudvlakte West
- Green Park
- Grootfontein
- Grootvlei
- Haakdoornboom
- Hallgate
- Hammanskraal
- Harry Gwala
- Hartebeesfontein
- Hebron
- Heidelberg
- Hillshaven
- Holfontein
- Impumelelo
- Itsoseng
- Ivory Park
- Johandeo
- Johannesburg
- Kaalfontein
- Kagiso
- Kameeldrift
- Kameelfontein
- Kameelkraal
- Kanana
- Kanana Park
- Katlehong
- Other
- Keinfontein
- Kekana Garden
- Kempton Park
- Khutsong
- Kleinfontein
- Kokosi
- Krugersdorp
- Kungwini Part 2
- Kwa-Thema
- Lakeside
- Langaville
- Lanseria
- Laudium
- Lawley
- Leeufontein
- Leeuport
- Lehae
- Lenasia
- Lenasia South
- Lenz
- Lesedi NU
- Letsatsing
- Lindelani Village
- Lucky 7
- Mabopane
- Magaliesburg
- Majaneng
- Makanyaneng
- Malatjie
- Mamello
- Mamelodi
- Mandela Village
- Marokolong
- Mashemong
- Mayibuye
- Merafong City NU
- Meyerton
- Midrand
- Midvaal NU
- Millgate Farm
- Mogale City NU
- Mhlakeng
- Mooiplaas



- Munsieville
- Nellmapius
- New Eersterus
- Nigel
- Nooitgecht
- Nufcor
- Oberholzer
- Olievenhoutbos
- Onverwacht
- Orange Farm
- Orient Hills
- Pebble Rock Golf Village
- Phomolong
- Poortjie
- Pretoria
- Rabie Ridge
- Ramotse
- Randburg
- Randfontein
- Randfontein NU
- Randvaal
- Ratanda
- Rayton
- Refilwe
- Rethabiseng
- Rietfontein
- Rietvallei
- Roodeplaat
- Roodepoort
- Sable Hills Waterfront Estate
- Sandton
- Saulsville
- Seberuberung
- Sebokeng
- Sharpeville
- Simunye
- Sonstraal
- Soshanguve
- Southdene
- Soutpan
- Soweto
- Spaarwater
- Springs
- Stinkwater
- Stretford
- Suurman
- Temba
- Tembisa
- The Carousel Casino and Entertainment World
- The Hill
- The Village
- Thembisile
- Thinasonke
- Tierpoort
- Tokoza
- Tsakane
- Tsebe
- Tshepiso
- Tshepisong
- Tshwane NU
- Tweedracht
- Tweefontein
- Vaal Marina
- Vaal Oewer
- Vaalbank
- Vanderbijlpark
- Vastfontein
- Venterspost
- Vereeniging
- Viskuil
- Vlakfontein

- Vosloorus
- Wageenbietjieskop
- Walkerville
- Wallis Haven
- Wallmannsthal
- Waterpan
- Waterval
- Waterworks
- Wattville
- Wedela
- Welperdiend
- West Village
- West-Driefontein
- Western Areas Gold Mine
- Western Deep Levels Mine
- Westonaria
- Westonaria NU
- Winterveld
- Wolwekrans
- Zakariyya Park
- Zenzele
- Zevenfontein
- Zithobeni
- Zwartkop
- Zwavelpoort

---

Please specify:

---



---

Where within Limpopo?

- Aganang
- Ba-Phalaborwa
- Bela-Bela
- Blouberg
- Elias Motsoaledi
- Fetakgomo
- Greater Giyani
- Greater Letaba
- Greater Marble Hall
- Greater Tubatse
- Greater Tzaneen
- Lepelle-Nkumpi
- Lephalale
- Makhado
- Makhuduthamaga
- Malamulele
- Maruleng
- Modimolle
- Mogalakwena
- Molemole
- Mookgopong
- Musina
- Polokwane
- Thabazimbi
- Thulamela
- Other
- Don't know

---

Please specify:

---



---

Where within Western Cape?

---

---

Where within Eastern Cape?

---

---

Where within North West?

---

---

Where within KwaZulu Natal?

---

---

Where within Northern Cape?

---

---

Where within Free State?

---

---

(4) Was it rural or urban?

- Rural
  - Urban (city or town)
  - Don't know
- (Rural meaning locations like villages, agricultural areas, or game farms)

---

(4) When did you start living there? MONTH

- January
- February
- March
- April
- May
- June
- July
- August
- September
- October
- November
- December
- Don't know

---

(4) When did you start living there? YEAR

- 2019
- 2018
- 2017
- 2016
- 2015
- 2014
- 2013
- 2012
- 2011
- 2010
- 2009
- 2008
- 2007
- 2006
- 2005
- 2004
- 2003
- 2002
- 2001
- 2000
- 1999
- 1998
- 1997
- 1996
- 1995
- 1994
- 1993
- 1992
- 1991
- 1990
- 1989
- 1988
- 1987
- 1986
- 1985
- 1984
- 1983
- 1982
- 1981
- 1980
- Don't Know

---

(4) What was your main reason for moving to this place of residence?

- Job assignment/transfer
- Retrenchment
- Better employment opportunities
- Better accommodation prospects
- Better educational/training opportunities
- Closer to school or work
- Better public/social services
- Moved with family
- Joined family or friends
- Marriage
- Divorce
- Death of a family member
- Family responsibility
- Attraction to urban life style
- Evicted from previous residence
- Not able to pay rent
- Government resettlement
- Left to escape violence
- Other (specify)
- Dont know

---

(4) Please specify

---

---

(4) What was your main formal/informal occupation in the month BEFORE you moved?

- None
  - Farm work
  - Domestic work
  - Construction work
  - Security work
  - Cleaning work
  - Small business owner
  - Mine work
  - Teacher
  - Traditional healer
  - Health sector (formal)
  - Game farm/game reserve (e.g. ranger)
  - Driver
  - Skilled worker (e.g. plumber, mechanic, electrician)
  - Cook/ chef/ catering
  - Unskilled worker (e.g. general labourer)
  - Artisan (e.g. carpenter, wood carver, weaver)
  - Waiter/ barman
  - Informal selling
  - Small business assistant
  - Clerical and office work
  - Cattle herder
  - Sewing, hairdressing, baking, brewing
  - Police, soldier, fireman
  - Petrol attendant
  - Timber, sawmill, poles
  - Gardening services
  - Fieldworker - NGO or university
  - Art, craft, photography, fashion design
  - Senior administrator, manager, professional
  - Priest/pastor
  - Retail/clerk/sales
  - Student
  - Other
  - Don't know
- ( If unsure of how to classify, select "Other" )

---

(4) Please specify

---

(4) What was your main formal/informal occupation in the month AFTER you moved?

- None
  - Farm work
  - Domestic work
  - Construction work
  - Security work
  - Cleaning work
  - Small business owner
  - Mine work
  - Teacher
  - Traditional healer
  - Health sector (formal)
  - Game farm/game reserve (e.g. ranger)
  - Driver
  - Skilled worker (e.g. plumber, mechanic, electrician)
  - Cook/ chef/ catering
  - Unskilled worker (e.g. general labourer)
  - Artisan (e.g. carpenter, wood carver, weaver)
  - Waiter/ barman
  - Informal selling
  - Small business assistant
  - Clerical and office work
  - Cattle herder
  - Sewing, hairdressing, baking, brewing
  - Police, soldier, fireman
  - Petrol attendant
  - Timber, sawmill, poles
  - Gardening services
  - Fieldworker - NGO or university
  - Art, craft, photography, fashion design
  - Senior administrator, manager, professional
  - Priest/pastor
  - Retail/clerk/sales
  - Student
  - Other
  - Don't know
- ( If unsure of how to classify, select "Other" )

(4) Please specify

---

(4) In what type of place did you live?

- Commercial farm
- Game farm/nature reserve
- Mine
- Military base
- City (inner)
- City (suburb)
- Town
- Village (trust land)
- Informal settlement (city)
- Informal settlement (rural)
- Township (urban)
- Township (rural)
- Other
- Don't know

(4) Please specify

---

---

(4) What type of dwelling did you live in?

- House, brick or concrete structure on a separate stand
- Traditional dwelling, hut or structure made of traditional materials
- Flat or apartment in a block of flats/complex
- Cluster house in a complex
- Townhouse
- Semi-detached house not in a complex
- House, flat or room separate from main dwelling in backyard
- Informal dwelling or shack in backyard
- Informal dwelling NOT in backyard, e.g. in informal squatter settlement or on a farm
- Room or flat which is part of main dwelling or property
- Caravan or tent
- Unit in a retirement home or barracks etc.
- Other
- Don't know

---

(4) Please specify

\_\_\_\_\_

---

(4) With?whom did you live at this residence?

- Parent(s)
- Spouse/partner/boyfriend/girlfriend
- Spouse and children
- Parent(s) in-law
- Friends
- Relatives
- Countrymen
- Alone
- Second family
- Other
- Don't know

---

(4) Please specify

\_\_\_\_\_

---

(4) When did you stop living there? MONTH

- January
- February
- March
- April
- May
- June
- July
- August
- September
- October
- November
- December
- Don't know



---

(4) When did you stop living there? YEAR

- 2019
- 2018
- 2017
- 2016
- 2015
- 2014
- 2013
- 2012
- 2011
- 2010
- 2009
- 2008
- 2007
- 2006
- 2005
- 2004
- 2003
- 2002
- 2001
- 2000
- 1999
- 1998
- 1997
- 1996
- 1995
- 1994
- 1993
- 1992
- 1991
- 1990
- 1989
- 1988
- 1987
- 1986
- 1985
- 1984
- 1983
- 1982
- 1981
- 1980
- Don't Know

---

The following questions are for the place you lived before that

---

What province?

- Mpumalanga
- Gauteng
- Limpopo
- Free State
- KwaZulu Natal
- Eastern Cape
- Western Cape
- Northern Cape
- North West
- Other

---

Please specify:

---

---

Where within Mpumalanga?

- Agincourt study site
- Barberton
- Bushbuckridge
- Dwarsloop
- Game park Mpumalanga
- Gemu / Hazyview
- Graskop/ Pilgrim's rest
- Kangwane (former homeland)
- Kiepersol
- Komatipoort
- Machadodorp
- Malelane
- Mapulaneng / Bushbuckridge
- Marite / Alexandria
- Matsulu
- Middleburg
- Mkhuhlu
- Nelspruit
- Pienaar (Nelspruit)
- Sabie
- Thulamahashe
- White River
- Witbank
- Zwelitsha
- Other Mpumalanga
- Don't know

---

Please specify:

---

---

Where within Gauteng

- Akasia
- Alberton
- Alexandra
- Atteridgeville
- Babelegi
- Bapsfontein
- Bashewa
- Baviaanspoort
- Bekkersdal
- Benoni
- Bhongweni
- Blue Hills
- Boipatong
- Boksburg
- Bon Accord
- Bonamanzi Marina and Country Club
- Bopelong
- Boschkop
- Bosplaas Mathabe
- Bothasgeluk
- Brakpan
- Breswol
- Bronkhorstspuit
- Bultfontein
- Carletonville
- Centurion
- Chartwell
- Cheetah Park
- Chief A Luthuli Park
- City of Johannesburg NU
- Clayville
- Cullinan
- Dainfern
- Daveyton
- Deelkraal Gold Mine
- Derdepoort
- Devon A
- Devon B
- Diepsloot
- Diloppe
- Donkerhoek
- Doornfontein
- Doornkraal
- Downbern
- Drie Ziek
- Duduza
- Dukathole
- East Driefontein
- East Village
- Ebony Park
- Edenvale
- Eersterust
- Ekangala
- Ekurhuleni NU
- Elandsfontein
- Elandsrand
- Elandsridge
- Elsburg Gold Mine
- Emfuleni NU
- Endicott
- Ennerdale
- Etwatwa
- Evaton
- Farmall
- Fochville
- Ga-Rankuwa
- Geluksdal
- Germiston
- Glen Harvie

- Golden Gardens
- Goudvlakte West
- Green Park
- Grootfontein
- Grootvlei
- Haakdoornboom
- Hallgate
- Hammanskraal
- Harry Gwala
- Hartebeesfontein
- Hebron
- Heidelberg
- Hillshaven
- Holfontein
- Impumelelo
- Itsoseng
- Ivory Park
- Johandeo
- Johannesburg
- Kaalfontein
- Kagiso
- Kameeldrift
- Kameelfontein
- Kameelkraal
- Kanana
- Kanana Park
- Katlehong
- Other
- Keinfontein
- Kekana Garden
- Kempton Park
- Khutsong
- Kleinfontein
- Kokosi
- Krugersdorp
- Kungwini Part 2
- Kwa-Thema
- Lakeside
- Langaville
- Lanseria
- Laudium
- Lawley
- Leeufontein
- Leeuport
- Lehae
- Lenasia
- Lenasia South
- Lenz
- Lesedi NU
- Letsatsing
- Lindelani Village
- Lucky 7
- Mabopane
- Magaliesburg
- Majaneng
- Makanyaneng
- Malatjie
- Mamello
- Mamelodi
- Mandela Village
- Marokolong
- Mashemong
- Mayibuye
- Merafong City NU
- Meyerton
- Midrand
- Midvaal NU
- Millgate Farm
- Mogale City NU
- Mhlakeng
- Mooiplaas

- Munsieville
- Nellmapius
- New Eersterus
- Nigel
- Nooitgecht
- Nufcor
- Oberholzer
- Olievenhoutbos
- Onverwacht
- Orange Farm
- Orient Hills
- Pebble Rock Golf Village
- Phomolong
- Poortjie
- Pretoria
- Rabie Ridge
- Ramotse
- Randburg
- Randfontein
- Randfontein NU
- Randvaal
- Ratanda
- Rayton
- Refilwe
- Rethabiseng
- Rietfontein
- Rietvallei
- Roodeplaat
- Roodepoort
- Sable Hills Waterfront Estate
- Sandton
- Saulsville
- Seberuberung
- Sebokeng
- Sharpeville
- Simunye
- Sonstraal
- Soshanguve
- Southdene
- Soutpan
- Soweto
- Spaarwater
- Springs
- Stinkwater
- Stretford
- Suurman
- Temba
- Tembisa
- The Carousel Casino and Entertainment World
- The Hill
- The Village
- Thembisile
- Thinasonke
- Tierpoort
- Tokoza
- Tsakane
- Tsebe
- Tshepiso
- Tshepisong
- Tshwane NU
- Tweedracht
- Tweefontein
- Vaal Marina
- Vaal Oewer
- Vaalbank
- Vanderbijlpark
- Vastfontein
- Venterspost
- Vereeniging
- Viskuil
- Vlakfontein

- Vosloorus
- Wageenbietjieskop
- Walkerville
- Wallis Haven
- Wallmannsthal
- Waterpan
- Waterval
- Waterworks
- Wattville
- Wedela
- Welperdiend
- West Village
- West-Driefontein
- Western Areas Gold Mine
- Western Deep Levels Mine
- Westonaria
- Westonaria NU
- Winterveld
- Wolwekrans
- Zakariyya Park
- Zenzele
- Zevenfontein
- Zithobeni
- Zwartkop
- Zwavelpoort

---

Please specify:

---



---

Where within Limpopo?

- Aganang
- Ba-Phalaborwa
- Bela-Bela
- Blouberg
- Elias Motsoaledi
- Fetakgomo
- Greater Giyani
- Greater Letaba
- Greater Marble Hall
- Greater Tubatse
- Greater Tzaneen
- Lepelle-Nkumpi
- Lephalale
- Makhado
- Makhuduthamaga
- Malamulele
- Maruleng
- Modimolle
- Mogalakwena
- Molemole
- Mookgopong
- Musina
- Polokwane
- Thabazimbi
- Thulamela
- Other
- Don't know

---

Please specify:

---



---

Where within Western Cape?

---

---

Where within Eastern Cape?

---

---

Where within North West?

---

---

Where within KwaZulu Natal?

---

---

Where within Northern Cape?

---

---

Where within Free State?

---

---

(5) Was it rural or urban?

- Rural
- Urban (city or town)
- Don't know  
(Rural meaning locations like villages,  
agricultural areas, or game farms)

---

(5) When did you start living there? MONTH

- January
- February
- March
- April
- May
- June
- July
- August
- September
- October
- November
- December
- Don't know

---

(5) When did you start living there? YEAR

- 2019
- 2018
- 2017
- 2016
- 2015
- 2014
- 2013
- 2012
- 2011
- 2010
- 2009
- 2008
- 2007
- 2006
- 2005
- 2004
- 2003
- 2002
- 2001
- 2000
- 1999
- 1998
- 1997
- 1996
- 1995
- 1994
- 1993
- 1992
- 1991
- 1990
- 1989
- 1988
- 1987
- 1986
- 1985
- 1984
- 1983
- 1982
- 1981
- 1980
- Don't Know



---

(5) What was your main reason for moving to this place of residence?

- Job assignment/transfer
- Retrenchment
- Better employment opportunities
- Better accommodation prospects
- Better educational/training opportunities
- Closer to school or work
- Better public/social services
- Moved with family
- Joined family or friends
- Marriage
- Divorce
- Death of a family member
- Family responsibility
- Attraction to urban life style
- Evicted from previous residence
- Not able to pay rent
- Government resettlement
- Left to escape violence
- Other (specify)
- Dont know

---

(5) Please specify

---

---

(5) What was your main formal/informal occupation in the month BEFORE you moved?

- None
  - Farm work
  - Domestic work
  - Construction work
  - Security work
  - Cleaning work
  - Small business owner
  - Mine work
  - Teacher
  - Traditional healer
  - Health sector (formal)
  - Game farm/game reserve (e.g. ranger)
  - Driver
  - Skilled worker (e.g. plumber, mechanic, electrician)
  - Cook/ chef/ catering
  - Unskilled worker (e.g. general labourer)
  - Artisan (e.g. carpenter, wood carver, weaver)
  - Waiter/ barman
  - Informal selling
  - Small business assistant
  - Clerical and office work
  - Cattle herder
  - Sewing, hairdressing, baking, brewing
  - Police, soldier, fireman
  - Petrol attendant
  - Timber, sawmill, poles
  - Gardening services
  - Fieldworker - NGO or university
  - Art, craft, photography, fashion design
  - Senior administrator, manager, professional
  - Priest/pastor
  - Retail/clerk/sales
  - Student
  - Other
  - Don't know
- ( If unsure of how to classify, select "Other" )

---

(5) Please specify

---

(5) What was your main formal/informal occupation in the month AFTER you moved?

- None
  - Farm work
  - Domestic work
  - Construction work
  - Security work
  - Cleaning work
  - Small business owner
  - Mine work
  - Teacher
  - Traditional healer
  - Health sector (formal)
  - Game farm/game reserve (e.g. ranger)
  - Driver
  - Skilled worker (e.g. plumber, mechanic, electrician)
  - Cook/ chef/ catering
  - Unskilled worker (e.g. general labourer)
  - Artisan (e.g. carpenter, wood carver, weaver)
  - Waiter/ barman
  - Informal selling
  - Small business assistant
  - Clerical and office work
  - Cattle herder
  - Sewing, hairdressing, baking, brewing
  - Police, soldier, fireman
  - Petrol attendant
  - Timber, sawmill, poles
  - Gardening services
  - Fieldworker - NGO or university
  - Art, craft, photography, fashion design
  - Senior administrator, manager, professional
  - Priest/pastor
  - Retail/clerk/sales
  - Student
  - Other
  - Don't know
- ( If unsure of how to classify, select "Other" )

(5) Please specify

---

(5) In what type of place did you live?

- Commercial farm
- Game farm/nature reserve
- Mine
- Military base
- City (inner)
- City (suburb)
- Town
- Village (trust land)
- Informal settlement (city)
- Informal settlement (rural)
- Township (urban)
- Township (rural)
- Other
- Don't know

(5) Please specify

---

---

(5) What type of dwelling did you live in?

- House, brick or concrete structure on a separate stand
- Traditional dwelling, hut or structure made of traditional materials
- Flat or apartment in a block of flats/complex
- Cluster house in a complex
- Townhouse
- Semi-detached house not in a complex
- House, flat or room separate from main dwelling in backyard
- Informal dwelling or shack in backyard
- Informal dwelling NOT in backyard, e.g. in informal squatter settlement or on a farm
- Room or flat which is part of main dwelling or property
- Caravan or tent
- Unit in a retirement home or barracks etc.
- Other
- Don't know

---

(5) Please specify

\_\_\_\_\_

---

(5) With?whom did you live at this residence?

- Parent(s)
- Spouse/partner/boyfriend/girlfriend
- Spouse and children
- Parent(s) in-law
- Friends
- Relatives
- Countrymen
- Alone
- Second family
- Other
- Don't know

---

(5) Please specify

\_\_\_\_\_

---

(5) When did you stop living there? MONTH

- January
- February
- March
- April
- May
- June
- July
- August
- September
- October
- November
- December
- Don't know

---

(5) When did you stop living there? YEAR

- 2019
- 2018
- 2017
- 2016
- 2015
- 2014
- 2013
- 2012
- 2011
- 2010
- 2009
- 2008
- 2007
- 2006
- 2005
- 2004
- 2003
- 2002
- 2001
- 2000
- 1999
- 1998
- 1997
- 1996
- 1995
- 1994
- 1993
- 1992
- 1991
- 1990
- 1989
- 1988
- 1987
- 1986
- 1985
- 1984
- 1983
- 1982
- 1981
- 1980
- Don't Know

---

The following questions are for the place you lived before that

---

What province?

- Mpumalanga
- Gauteng
- Limpopo
- Free State
- KwaZulu Natal
- Eastern Cape
- Western Cape
- Northern Cape
- North West
- Other

---

Please specify:

---

---

Where within Mpumalanga?

- Agincourt study site
- Barberton
- Bushbuckridge
- Dwarsloop
- Game park Mpumalanga
- Gemu / Hazyview
- Graskop/ Pilgrim's rest
- Kangwane (former homeland)
- Kiepersol
- Komatipoort
- Machadodorp
- Malelane
- Mapulaneng / Bushbuckridge
- Marite / Alexandria
- Matsulu
- Middleburg
- Mkhuhlu
- Nelspruit
- Pienaar (Nelspruit)
- Sabie
- Thulamahashe
- White River
- Witbank
- Zwelitsha
- Other Mpumalanga
- Don't know

---

Please specify:

---

---

Where within Gauteng

- Akasia
- Alberton
- Alexandra
- Atteridgeville
- Babelegi
- Bapsfontein
- Bashewa
- Baviaanspoort
- Bekkersdal
- Benoni
- Bhongweni
- Blue Hills
- Boipatong
- Boksburg
- Bon Accord
- Bonamanzi Marina and Country Club
- Bophelong
- Boschkop
- Bosplaas Mathabe
- Bothasgeluk
- Brakpan
- Breswol
- Bronkhorstspuit
- Bultfontein
- Carletonville
- Centurion
- Chartwell
- Cheetah Park
- Chief A Luthuli Park
- City of Johannesburg NU
- Clayville
- Cullinan
- Dainfern
- Daveyton
- Deelkraal Gold Mine
- Derdepoort
- Devon A
- Devon B
- Diepsloot
- Diloppe
- Donkerhoek
- Doornfontein
- Doornkraal
- Downbern
- Drie Ziek
- Duduza
- Dukathole
- East Driefontein
- East Village
- Ebony Park
- Edenvale
- Eersterust
- Ekangala
- Ekurhuleni NU
- Elandsfontein
- Elandsrand
- Elandsridge
- Elsburg Gold Mine
- Emfuleni NU
- Endicott
- Ennerdale
- Etwatwa
- Evaton
- Farmall
- Fochville
- Ga-Rankuwa
- Geluksdal
- Germiston
- Glen Harvie

- Golden Gardens
- Goudvlakte West
- Green Park
- Grootfontein
- Grootvlei
- Haakdoornboom
- Hallgate
- Hammanskraal
- Harry Gwala
- Hartebeesfontein
- Hebron
- Heidelberg
- Hillshaven
- Holfontein
- Impumelelo
- Itsoseng
- Ivory Park
- Johandeo
- Johannesburg
- Kaalfontein
- Kagiso
- Kameeldrift
- Kameelfontein
- Kameelkraal
- Kanana
- Kanana Park
- Katlehong
- Other
- Keinfontein
- Kekana Garden
- Kempton Park
- Khutsong
- Kleinfontein
- Kokosi
- Krugersdorp
- Kungwini Part 2
- Kwa-Thema
- Lakeside
- Langaville
- Lanseria
- Laudium
- Lawley
- Leeufontein
- Leeuport
- Lehae
- Lenasia
- Lenasia South
- Lenz
- Lesedi NU
- Letsatsing
- Lindelani Village
- Lucky 7
- Mabopane
- Magaliesburg
- Majaneng
- Makanyaneng
- Malatjie
- Mamello
- Mamelodi
- Mandela Village
- Marokolong
- Mashemong
- Mayibuye
- Merafong City NU
- Meyerton
- Midrand
- Midvaal NU
- Millgate Farm
- Mogale City NU
- Mhlakeng
- Mooiplaas



- Munsieville
- Nellmapius
- New Eersterus
- Nigel
- Nooitgecht
- Nufcor
- Oberholzer
- Olievenhoutbos
- Onverwacht
- Orange Farm
- Orient Hills
- Pebble Rock Golf Village
- Phomolong
- Poortjie
- Pretoria
- Rabie Ridge
- Ramotse
- Randburg
- Randfontein
- Randfontein NU
- Randvaal
- Ratanda
- Rayton
- Refilwe
- Rethabiseng
- Rietfontein
- Rietvallei
- Roodeplaat
- Roodepoort
- Sable Hills Waterfront Estate
- Sandton
- Saulsville
- Seberuberung
- Sebokeng
- Sharpeville
- Simunye
- Sonstraal
- Soshanguve
- Southdene
- Soutpan
- Soweto
- Spaarwater
- Springs
- Stinkwater
- Stretford
- Suurman
- Temba
- Tembisa
- The Carousel Casino and Entertainment World
- The Hill
- The Village
- Thembisile
- Thinasonke
- Tierpoort
- Tokoza
- Tsakane
- Tsebe
- Tshepiso
- Tshepisong
- Tshwane NU
- Tweedracht
- Tweefontein
- Vaal Marina
- Vaal Oewer
- Vaalbank
- Vanderbijlpark
- Vastfontein
- Venterspost
- Vereeniging
- Viskuil
- Vlakfontein

- Vosloorus
- Wageenbietjieskop
- Walkerville
- Wallis Haven
- Wallmannsthal
- Waterpan
- Waterval
- Waterworks
- Wattville
- Wedela
- Welperdiend
- West Village
- West-Driefontein
- Western Areas Gold Mine
- Western Deep Levels Mine
- Westonaria
- Westonaria NU
- Winterveld
- Wolwekrans
- Zakariyya Park
- Zenzele
- Zevenfontein
- Zithobeni
- Zwartkop
- Zwavelpoort

---

Please specify:

---



---

Where within Limpopo?

- Aganang
- Ba-Phalaborwa
- Bela-Bela
- Blouberg
- Elias Motsoaledi
- Fetakgomo
- Greater Giyani
- Greater Letaba
- Greater Marble Hall
- Greater Tubatse
- Greater Tzaneen
- Lepelle-Nkumpi
- Lephhalale
- Makhado
- Makhuduthamaga
- Malamulele
- Maruleng
- Modimolle
- Mogalakwena
- Molemole
- Mookgopong
- Musina
- Polokwane
- Thabazimbi
- Thulamela
- Other
- Don't know

---

Please specify:

---



---

Where within Western Cape?

---

---

Where within Eastern Cape?

---

---

Where within North West?

---

---

Where within KwaZulu Natal?

---

---

Where within Northern Cape?

---

---

Where within Free State?

---

---

(6) Was it rural or urban?

- Rural
- Urban (city or town)
- Don't know  
(Rural meaning locations like villages,  
agricultural areas, or game farms)

---

(6) When did you start living there? MONTH

- January
- February
- March
- April
- May
- June
- July
- August
- September
- October
- November
- December
- Don't know

---

(6) When did you start living there? YEAR

- 2019
- 2018
- 2017
- 2016
- 2015
- 2014
- 2013
- 2012
- 2011
- 2010
- 2009
- 2008
- 2007
- 2006
- 2005
- 2004
- 2003
- 2002
- 2001
- 2000
- 1999
- 1998
- 1997
- 1996
- 1995
- 1994
- 1993
- 1992
- 1991
- 1990
- 1989
- 1988
- 1987
- 1986
- 1985
- 1984
- 1983
- 1982
- 1981
- 1980
- Don't Know

---

(6) What was your main reason for moving to this place of residence?

- Job assignment/transfer
- Retrenchment
- Better employment opportunities
- Better accommodation prospects
- Better educational/training opportunities
- Closer to school or work
- Better public/social services
- Moved with family
- Joined family or friends
- Marriage
- Divorce
- Death of a family member
- Family responsibility
- Attraction to urban life style
- Evicted from previous residence
- Not able to pay rent
- Government resettlement
- Left to escape violence
- Other (specify)
- Dont know

---

(6) Please specify

---

---

(6) What was your main formal/informal occupation in the month BEFORE you moved?

- None
  - Farm work
  - Domestic work
  - Construction work
  - Security work
  - Cleaning work
  - Small business owner
  - Mine work
  - Teacher
  - Traditional healer
  - Health sector (formal)
  - Game farm/game reserve (e.g. ranger)
  - Driver
  - Skilled worker (e.g. plumber, mechanic, electrician)
  - Cook/ chef/ catering
  - Unskilled worker (e.g. general labourer)
  - Artisan (e.g. carpenter, wood carver, weaver)
  - Waiter/ barman
  - Informal selling
  - Small business assistant
  - Clerical and office work
  - Cattle herder
  - Sewing, hairdressing, baking, brewing
  - Police, soldier, fireman
  - Petrol attendant
  - Timber, sawmill, poles
  - Gardening services
  - Fieldworker - NGO or university
  - Art, craft, photography, fashion design
  - Senior administrator, manager, professional
  - Priest/pastor
  - Retail/clerk/sales
  - Student
  - Other
  - Don't know
- ( If unsure of how to classify, select "Other" )

---

(6) Please specify

---

(6) What was your main formal/informal occupation in the month AFTER you moved?

- None
  - Farm work
  - Domestic work
  - Construction work
  - Security work
  - Cleaning work
  - Small business owner
  - Mine work
  - Teacher
  - Traditional healer
  - Health sector (formal)
  - Game farm/game reserve (e.g. ranger)
  - Driver
  - Skilled worker (e.g. plumber, mechanic, electrician)
  - Cook/ chef/ catering
  - Unskilled worker (e.g. general labourer)
  - Artisan (e.g. carpenter, wood carver, weaver)
  - Waiter/ barman
  - Informal selling
  - Small business assistant
  - Clerical and office work
  - Cattle herder
  - Sewing, hairdressing, baking, brewing
  - Police, soldier, fireman
  - Petrol attendant
  - Timber, sawmill, poles
  - Gardening services
  - Fieldworker - NGO or university
  - Art, craft, photography, fashion design
  - Senior administrator, manager, professional
  - Priest/pastor
  - Retail/clerk/sales
  - Student
  - Other
  - Don't know
- ( If unsure of how to classify, select "Other" )

(6) Please specify

---

(6) In what type of place did you live?

- Commercial farm
- Game farm/nature reserve
- Mine
- Military base
- City (inner)
- City (suburb)
- Town
- Village (trust land)
- Informal settlement (city)
- Informal settlement (rural)
- Township (urban)
- Township (rural)
- Other
- Don't know

(6) Please specify

---

---

(6) What type of dwelling did you live in?

- House, brick or concrete structure on a separate stand
- Traditional dwelling, hut or structure made of traditional materials
- Flat or apartment in a block of flats/complex
- Cluster house in a complex
- Townhouse
- Semi-detached house not in a complex
- House, flat or room separate from main dwelling in backyard
- Informal dwelling or shack in backyard
- Informal dwelling NOT in backyard, e.g. in informal squatter settlement or on a farm
- Room or flat which is part of main dwelling or property
- Caravan or tent
- Unit in a retirement home or barracks etc.
- Other
- Don't know

---

(6) When did you stop living there? MONTH

- January
- February
- March
- April
- May
- June
- July
- August
- September
- October
- November
- December
- Don't know

---

(6) Please specify

---

---

(6) With?whom did you live at this residence?

- Parent(s)
- Spouse/partner/boyfriend/girlfriend
- Spouse and children
- Parent(s) in-law
- Friends
- Relatives
- Countrymen
- Alone
- Second family
- Other
- Don't know

---

(6) Please specify

---



---

(6) When did you stop living there? YEAR

- 2019
- 2018
- 2017
- 2016
- 2015
- 2014
- 2013
- 2012
- 2011
- 2010
- 2009
- 2008
- 2007
- 2006
- 2005
- 2004
- 2003
- 2002
- 2001
- 2000
- 1999
- 1998
- 1997
- 1996
- 1995
- 1994
- 1993
- 1992
- 1991
- 1990
- 1989
- 1988
- 1987
- 1986
- 1985
- 1984
- 1983
- 1982
- 1981
- 1980
- Don't Know

---

When you've completed [q\_6\_10] residence history loops, select "Save and go to next instrument"

## Short Term Absences

---

---

### SHORT TERM ABSENCES (for non-migrants)

In the past 12 months, have you been away from [q\_1\_5] for more than one month?

- Yes
- No
- Dont know

---

During your most recent trip away, how long did you spend away from your home village?

- 1-2 months
- 2-3 months
- 3-6 months
- Dont know

---

Why were you away?

- Taking up employment/work
- Looking for work
- School/Training
- To be with spouse/partner
- Holiday
- Health reasons
- Look after/assist family members
- Family conflict
- Looking for better housing
- Escape unfavorable conditions
- Other
- Don't know

---

Please specify

---

Where did you live/stay during this time away from [q\_1\_5]? What province?

- Mpumalanga
- Gauteng
- Limpopo
- Free State
- KwaZulu Natal
- Eastern Cape
- Western Cape
- Northern Cape
- North West
- Other

---

Please specify:

---

---

Where within Mpumalanga?

- Agincourt study site
- Barberton
- Bushbuckridge
- Dwarsloop
- Game park Mpumalanga
- Gemu / Hazyview
- Graskop/ Pilgrim's rest
- Kangwane (former homeland)
- Kiepersol
- Komatipoort
- Machadodorp
- Malelane
- Mapulaneng / Bushbuckridge
- Marite / Alexandria
- Matsulu
- Middleburg
- Mkhuhlu
- Nelspruit
- Pienaar (Nelspruit)
- Sabie
- Thulamahashe
- White River
- Witbank
- Zwelitsha
- Other Mpumalanga
- Don't know

---

Please specify:

---

---

Where within Gauteng

- Akasia
- Alberton
- Alexandra
- Atteridgeville
- Babelegi
- Bapsfontein
- Bashewa
- Baviaanspoort
- Bekkersdal
- Benoni
- Bhongweni
- Blue Hills
- Boipatong
- Boksburg
- Bon Accord
- Bonamanzi Marina and Country Club
- Bopelong
- Boschkop
- Bosplaas Mathabe
- Bothasgeluk
- Brakpan
- Breswol
- Bronkhorstspuit
- Bultfontein
- Carletonville
- Centurion
- Chartwell
- Cheetah Park
- Chief A Luthuli Park
- City of Johannesburg NU
- Clayville
- Cullinan
- Dainfern
- Daveyton
- Deelkraal Gold Mine
- Derdepoort
- Devon A
- Devon B
- Diepsloot
- Diloppe
- Donkerhoek
- Doornfontein
- Doornkraal
- Downbern
- Drie Ziek
- Duduza
- Dukathole
- East Driefontein
- East Village
- Ebony Park
- Edenvale
- Eersterust
- Ekangala
- Ekurhuleni NU
- Elandsfontein
- Elandsrand
- Elandsridge
- Elsburg Gold Mine
- Emfuleni NU
- Endicott
- Ennerdale
- Etwatwa
- Evaton
- Farmall
- Fochville
- Ga-Rankuwa
- Geluksdal
- Germiston
- Glen Harvie

- Golden Gardens
- Goudvlakte West
- Green Park
- Grootfontein
- Grootvlei
- Haakdoornboom
- Hallgate
- Hammanskraal
- Harry Gwala
- Hartebeesfontein
- Hebron
- Heidelberg
- Hillshaven
- Holfontein
- Impumelelo
- Itsoseng
- Ivory Park
- Johandeo
- Johannesburg
- Kaalfontein
- Kagiso
- Kameeldrift
- Kameelfontein
- Kameelkraal
- Kanana
- Kanana Park
- Katlehong
- Other
- Keinfontein
- Kekana Garden
- Kempton Park
- Khutsong
- Kleinfontein
- Kokosi
- Krugersdorp
- Kungwini Part 2
- Kwa-Thema
- Lakeside
- Langaville
- Lanseria
- Laudium
- Lawley
- Leeufontein
- Leeuport
- Lehae
- Lenasia
- Lenasia South
- Lenz
- Lesedi NU
- Letsatsing
- Lindelani Village
- Lucky 7
- Mabopane
- Magaliesburg
- Majaneng
- Makanyaneng
- Malatjie
- Mamello
- Mamelodi
- Mandela Village
- Marokolong
- Mashemong
- Mayibuye
- Merafong City NU
- Meyerton
- Midrand
- Midvaal NU
- Millgate Farm
- Mogale City NU
- Mhlakeng
- Mooiplaas

- Munsieville
- Nellmapius
- New Eersterus
- Nigel
- Nooitgecht
- Nufcor
- Oberholzer
- Olievenhoutbos
- Onverwacht
- Orange Farm
- Orient Hills
- Pebble Rock Golf Village
- Phomolong
- Poortjie
- Pretoria
- Rabie Ridge
- Ramotse
- Randburg
- Randfontein
- Randfontein NU
- Randvaal
- Ratanda
- Rayton
- Refilwe
- Rethabiseng
- Rietfontein
- Rietvallei
- Roodeplaat
- Roodepoort
- Sable Hills Waterfront Estate
- Sandton
- Saulsville
- Seberuberung
- Sebokeng
- Sharpeville
- Simunye
- Sonstraal
- Soshanguve
- Southdene
- Soutpan
- Soweto
- Spaarwater
- Springs
- Stinkwater
- Stretford
- Suurman
- Temba
- Tembisa
- The Carousel Casino and Entertainment World
- The Hill
- The Village
- Thembisile
- Thinasonke
- Tierpoort
- Tokoza
- Tsakane
- Tsebe
- Tshepiso
- Tshepisong
- Tshwane NU
- Tweedracht
- Tweefontein
- Vaal Marina
- Vaal Oewer
- Vaalbank
- Vanderbijlpark
- Vastfontein
- Venterspost
- Vereeniging
- Viskuil
- Vlakfontein

- Vosloorus
- Wageenbietjieskop
- Walkerville
- Wallis Haven
- Wallmannsthal
- Waterpan
- Waterval
- Waterworks
- Wattville
- Wedela
- Welperdiend
- West Village
- West-Driefontein
- Western Areas Gold Mine
- Western Deep Levels Mine
- Westonaria
- Westonaria NU
- Winterveld
- Wolwekrans
- Zakariyya Park
- Zenzele
- Zevenfontein
- Zithobeni
- Zwartkop
- Zwavelpoort

---

Please specify:

---



---

Where within Limpopo?

- Aganang
- Ba-Phalaborwa
- Bela-Bela
- Blouberg
- Elias Motsoaledi
- Fetakgomo
- Greater Giyani
- Greater Letaba
- Greater Marble Hall
- Greater Tubatse
- Greater Tzaneen
- Lepelle-Nkumpi
- Lephalale
- Makhado
- Makhuduthamaga
- Malamulele
- Maruleng
- Modimolle
- Mogalakwena
- Molemole
- Mookgopong
- Musina
- Polokwane
- Thabazimbi
- Thulamela
- Other
- Don't know

---

Please specify:

---



---

Where within Western Cape?

---

---

Where within Eastern Cape?

---



---

Where within North West?

---



---

Where within KwaZulu Natal?

---



---

Where within Northern Cape?

---



---

Where within Free State?

---



---

In what type of place did you live during this time?

- Commercial farm
- Game farm/nature reserve
- Mine
- Military base
- City (inner)
- City (suburb)
- Town
- Village (trust land)
- Informal settlement (city)
- Informal settlement (rural)
- Township (urban)
- Township (rural)
- Other
- Don't know

---

Please specify

---



---

Was it rural or urban

- Rural
  - Urban (city or town)
  - Don't know
- (Rural meaning locations like villages, agricultural areas, or game farms)

---

What type of dwelling did you stay in during this time?

- House, brick or concrete structure on a separate stand
- Traditional dwelling, hut or structure made of traditional materials
- Flat or apartment in a block of flats/complex
- Cluster house in a complex
- Townhouse
- Semi-detached house not in a complex
- House, flat or room separate from main dwelling in backyard
- Informal dwelling or shack in backyard
- Informal dwelling NOT in backyard, e.g. in informal squatter settlement or on a farm
- Room or flat which is part of main dwelling or property
- Caravan or tent
- Unit in a retirement home or barracks etc.
- Other
- Don't know



---

Please specify

---

Mark as "Complete" and select "Save and go to next instrument" when complete

# Remittances

---

## REMITTANCES

Do you typically send money or goods back to [q\_1\_5] while you are away?

- Yes  
 No  
 Don't know

During the past 12 months, who is the main person that you normally send your money to?

- Mother  
 Father  
 Spouse/Partner  
 Son  
 Daughter  
 Maternal Grandmother  
 Maternal Grandfather  
 Paternal Grandmother  
 Paternal Grandfather  
 Maternal Aunt  
 Maternal Uncle  
 Paternal Aunt  
 Paternal Uncle  
 Other (specify)  
 Dont know

Please specify

---

In the past 12 months, what was the value of the money or goods you sent back?

- Less than R199  
 R200-R499  
 R500-R999  
 R1 000-R1 499  
 R1 500-R2 499  
 More than R2 500  
 Don't know

In the past 12 months, did you personally buy any of the following for the household in [q\_1\_5]?

- Food  
 Clothing  
 Cell phone  
 Airtime  
 Household appliances (e.g. fridge, microwave, etc.)  
 Livestock  
 Furniture  
 Building materials  
 Vehicle  
 Other  
 Don't know

Please specify

---

---

In the past 12 months, when did you typically visit [q\_1\_5]?

- I do not visit home
- Most weekends
- Month ends
- Month ends plus holiday(s)
- One long period/holiday
- Two periods/holidays
- School holidays
- Christmas and Easter
- Christmas only
- Irregularly
- Other
- Don't know

---

Please specify \_\_\_\_\_

---

When did you last visit [q\_1\_5]?

- Never
- In the last month
- 2-3 months ago
- 4-5 months ago
- 6 months to 1 year ago
- 1 to 2 years ago
- More than 2 years ago
- Don't know

---

When was the most recent communication between you and somebody in the household in [q\_1\_5]?

- Within the last week
- Within the last month (but more than a week)
- 2-3 months ago
- 4-5 months ago
- 6 months to 1 year ago
- 1 to 2 years ago
- More than 2 years ago
- Never
- Don't know

---

What mode was used for this recent communication?

- In person at home
- In person at work
- Telephone (call)
- Telephone (text/sms)
- Verbal message
- Email
- Social media (Facebook, Twitter, etc.)
- WhatsApp
- Written message/letter
- Other
- Don't know

---

Please specify \_\_\_\_\_

---

Mark as "Complete" and select "Save and go to next instrument" when complete

# Social Capital

---

## SOCIAL CAPITAL

Do you have a family member(s) or relative(s) living near you?

Yes  No  Dont know

Did you personally get any assistance (money, food, childcare, or other material help) from your family member in the last month?

Yes  
 No  
 Dont know

What type of assistance did you get?

- Food
- Money
- Other household groceries
- Uniform
- Clothing, excluding uniform
- Child care
- Transport
- Care when sick
- Care of the elderly or sick
- Fuel (e.g. wood, petrol, paraffin)
- Help with household chores
- Guidance/advice
- Assistance finding work/networking
- Other
- Don't know

Please specify

---

Do you have a friend(s) living near you?

Yes  No  Dont know

Did you personally get any assistance (money, food, childcare, or other material help) from your friend in the last month?

Yes  
 No  
 Dont know

What type of assistance did you get?

- Food
- Money
- Other household groceries
- Uniform
- Clothing, excluding uniform
- Child care
- Transport
- Care when sick
- Care of the elderly or sick
- Fuel (e.g. wood, petrol, paraffin)
- Help with household chores
- Guidance/advice
- Assistance finding work/networking
- Other
- Don't know

---

Please specify

---

Mark as "Complete" and select "Save and go to next instrument" when complete

# General Health

## GENERAL HEALTH

In general, how would you rate your health today?

- Very poor
- Poor
- Average
- Good
- Very good

Compared to this time last year, would you say your health is:

- Much worse
- Worse
- Same
- Better
- Much better

Compared to most people of your age and gender in your village/neighbourhood, would you say your health is generally:

- Much worse
  - Worse
  - Same
  - Better
  - Much better
- (Here we mean where the respondent is CURRENTLY LIVING.)

Overall in the last 30 days, how much difficulty did you have with work or household activities?

- None
- Mild
- Moderate
- Severe
- Extreme/Cannot do  
(e.g. your job, cooking, cleaning, toileting, etc)

In the past year, were you ever sick so that you couldn't work or attend school?

- Yes
- No
- Dont know

For how long?

- A day
- 2-3 days
- 4-7 days
- 1-2 weeks
- More than 2 weeks
- Dont know

In the past year, have you been sick continuously for longer than a month?

- Yes
- No
- Dont know

Have you ever been told by a doctor, nurse, or other medical professional that you have a chronic illness?

- Yes
  - No
  - Don't know
- (A chronic illness is a disease or illness that lasts for 6 months or more)

---

Which of the following chronic illnesses have you been diagnosed with?

- High blood pressure or hypertension
- Diabetes
- High cholesterol
- HIV
- TB
- Asthma
- Chronic Obstructive Pulmonary (COPD)/Emphysema Disease
- Depression or other mental health condition
- Stroke
- Other
- Dont know

---

Please specify

---

---

Are you on medication for a chronic illness (medication repeated for more than 3 months)?

- Yes
- No
- Dont know

---

What are the conditions for which you are currently using prescribed medication?

- High blood pressure or hypertension
- Diabetes
- High cholesterol
- HIV
- TB
- Asthma
- Chronic Obstructive Pulmonary (COPD)/Emphysema Disease
- Depression or other mental health condition
- Stroke
- Other
- Dont know

(A respondent may have been diagnosed with a chronic illness but is not taking medication for it. )

---

Please specify

---

---

When were you diagnosed with high blood pressure or hypertension? (MONTH)

- January
- February
- March
- April
- May
- June
- July
- August
- September
- October
- November
- December
- Don't know

When were you diagnosed with high blood pressure or hypertension? (YEAR)

- 2019
- 2018
- 2017
- 2016
- 2015
- 2014
- 2013
- 2012
- 2011
- 2010
- 2009
- 2008
- 2007
- 2006
- 2005
- 2004
- 2003
- 2002
- 2001
- 2000
- 1999
- 1998
- 1997
- 1996
- 1995
- 1994
- 1993
- 1992
- 1991
- 1990
- 1989
- 1988
- 1987
- 1986
- 1985
- 1984
- 1983
- 1982
- 1981
- 1980

Where were you living when you were diagnosed with high blood pressure or hypertension?

- Same village/neighbourhood in [q\_1\_5]
  - Village/neighbourhood nearby [q\_1\_5]
  - Same village/neighbourhood in [current\_residence]
  - Village/neighbourhood nearby [current\_residence]
  - Other
  - Don't know
- (If the answer categories repeat (i.e. origin location and current residence are the same), select the answer from the first two options (unless other or don't know))

Please specify

In the last 12 months have you sought and/or needed treatment for your high blood pressure or hypertension?

- Yes
- No
- Dont know

In the last 12 months have you experienced a lapse or difficulty in accessing your treatment for high blood pressure or hypertension?

- Yes
- No
- Dont know



---

Why was there a lapse or difficulty in accessing your treatment for high blood pressure or hypertension?

- Could not afford the cost of the visit
- No transport available
- Could not afford the cost of transport
- Treated poorly during a previous visit
- Could not take time off of work; busy
- Drugs or equipment seemingly inadequate
- Health providers skills seemingly inadequate
- Did not know where to go
- Tried but was denied health care
- Did not think you were sick enough
- Difficulties due to moving/relocating
- Could not find health care facilities or doctor
- Other
- Don't know

---

Please specify

---

---

When were you diagnosed with diabetes (MONTH)

- January
- February
- March
- April
- May
- June
- July
- August
- September
- October
- November
- December
- Don't know

---

When were you diagnosed with diabetes? (YEAR)

- 2019
- 2018
- 2017
- 2016
- 2015
- 2014
- 2013
- 2012
- 2011
- 2010
- 2009
- 2008
- 2007
- 2006
- 2005
- 2004
- 2003
- 2002
- 2001
- 2000
- 1999
- 1998
- 1997
- 1996
- 1995
- 1994
- 1993
- 1992
- 1991
- 1990
- 1989
- 1988
- 1987
- 1986
- 1985
- 1984
- 1983
- 1982
- 1981
- 1980

---

Where were you living when you were diagnosed with diabetes?

- Same village/neighbourhood in [q\_1\_5]
  - Village/neighbourhood nearby [q\_1\_5]
  - Same village/neighbourhood in [current\_residence]
  - Village/neighbourhood nearby [current\_residence]
  - Other
  - Don't know
- (If the answer categories repeat (i.e. origin location and current residence are the same), select the answer from the first two options (unless other or don't know))

---

Please specify

---



---

In the last 12 months have you sought and/or needed treatment for your diabetes?

- Yes
- No
- Dont know

---

In the last 12 months have you experienced a lapse or difficulty in accessing your treatment for diabetes?

- Yes
- No
- Dont know

---

Why was there a lapse or difficulty in accessing your treatment for diabetes?

- Could not afford the cost of the visit
- No transport available
- Could not afford the cost of transport
- Treated poorly during a previous visit
- Could not take time off of work; busy
- Drugs or equipment seemingly inadequate
- Health providers skills seemingly inadequate
- Did not know where to go
- Tried but was denied health care
- Did not think you were sick enough
- Difficulties due to moving/relocating
- Could not find health care facilities or doctor
- Other
- Don't know

---

Please specify

---

---

When were you told by a doctor, nurse, or medical professional that you had a stroke? (MONTH)

- January
- February
- March
- April
- May
- June
- July
- August
- September
- October
- November
- December
- Don't know

When were you told by a doctor, nurse, or medical professional that you had a stroke? (YEAR)

- 2019
- 2018
- 2017
- 2016
- 2015
- 2014
- 2013
- 2012
- 2011
- 2010
- 2009
- 2008
- 2007
- 2006
- 2005
- 2004
- 2003
- 2002
- 2001
- 2000
- 1999
- 1998
- 1997
- 1996
- 1995
- 1994
- 1993
- 1992
- 1991
- 1990
- 1989
- 1988
- 1987
- 1986
- 1985
- 1984
- 1983
- 1982
- 1981
- 1980

Where were you living when you were told by a doctor, nurse, or medical professional that you had a stroke?

- Same village/neighbourhood in [q\_1\_5]
  - Village/neighbourhood nearby [q\_1\_5]
  - Same village/neighbourhood in [current\_residence]
  - Village/neighbourhood nearby [current\_residence]
  - Other
  - Don't know
- (If the answer categories repeat (i.e. origin location and current residence are the same), select the answer from the first two options (unless other or don't know))

Please specify

---

In the last 12 months have you sought and/or needed treatment for your stroke?

- Yes
- No
- Dont know

In the last 12 months have you experienced a lapse or difficulty in accessing your treatment for your stroke?

- Yes
- No
- Dont know

---

Why was there a lapse or difficulty in accessing your treatment for your stroke?

- Could not afford the cost of the visit
- No transport available
- Could not afford the cost of transport
- Treated poorly during a previous visit
- Could not take time off of work; busy
- Drugs or equipment seemingly inadequate
- Health providers skills seemingly inadequate
- Did not know where to go
- Tried but was denied health care
- Did not think you were sick enough
- Difficulties due to moving/relocating
- Could not find health care facilities or doctor
- Other
- Don't know

---

Please specify

---

---

When were you diagnosed with TB (MONTH)

- January
- February
- March
- April
- May
- June
- July
- August
- September
- October
- November
- December
- Don't know

---

When were you diagnosed with TB? (YEAR)

- 2019
- 2018
- 2017
- 2016
- 2015
- 2014
- 2013
- 2012
- 2011
- 2010
- 2009
- 2008
- 2007
- 2006
- 2005
- 2004
- 2003
- 2002
- 2001
- 2000
- 1999
- 1998
- 1997
- 1996
- 1995
- 1994
- 1993
- 1992
- 1991
- 1990
- 1989
- 1988
- 1987
- 1986
- 1985
- 1984
- 1983
- 1982
- 1981
- 1980

---

Where were you living when you were diagnosed with TB?

- Same village/neighbourhood in [q\_1\_5]
  - Village/neighbourhood nearby [q\_1\_5]
  - Same village/neighbourhood in [current\_residence]
  - Village/neighbourhood nearby [current\_residence]
  - Other
  - Don't know
- (If the answer categories repeat (i.e. origin location and current residence are the same), select the answer from the first two options (unless other or don't know))

---

Please specify

---



---

In the last 12 months have you sought and/or needed treatment for your TB?

- Yes
- No
- Dont know

---

In the last 12 months have you experienced a lapse or difficulty in accessing your treatment for your TB?

- Yes
- No
- Dont know

---

Why was there a lapse or difficulty in accessing your treatment for your TB?

- Could not afford the cost of the visit
- No transport available
- Could not afford the cost of transport
- Treated poorly during a previous visit
- Could not take time off of work; busy
- Drugs or equipment seemingly inadequate
- Health providers skills seemingly inadequate
- Did not know where to go
- Tried but was denied health care
- Did not think you were sick enough
- Difficulties due to moving/relocating
- Could not find health care facilities or doctor
- Other
- Don't know

---

Please specify

---

---

When were you diagnosed with HIV (MONTH)

- January
- February
- March
- April
- May
- June
- July
- August
- September
- October
- November
- December
- Don't know

---

When were you diagnosed with HIV? (YEAR)

- 2019
- 2018
- 2017
- 2016
- 2015
- 2014
- 2013
- 2012
- 2011
- 2010
- 2009
- 2008
- 2007
- 2006
- 2005
- 2004
- 2003
- 2002
- 2001
- 2000
- 1999
- 1998
- 1997
- 1996
- 1995
- 1994
- 1993
- 1992
- 1991
- 1990
- 1989
- 1988
- 1987
- 1986
- 1985
- 1984
- 1983
- 1982
- 1981
- 1980

---

Where were you living when you were diagnosed with HIV?

- Same village/neighbourhood in [q\_1\_5]
  - Village/neighbourhood nearby [q\_1\_5]
  - Same village/neighbourhood in [current\_residence]
  - Village/neighbourhood nearby [current\_residence]
  - Other
  - Don't know
- (If the answer categories repeat (i.e. origin location and current residence are the same), select the answer from the first two options (unless other or don't know))

---

Please specify

---



---

In the last 12 months have you sought treatment for your HIV?

- Yes
- No
- Dont know

---

In the last 12 months have you experienced a lapse or difficulty in accessing your treatment for HIV?

- Yes
- No
- Dont know



---

Why was there a lapse or difficulty in accessing your treatment for your HIV?

- Could not afford the cost of the visit
- No transport available
- Could not afford the cost of transport
- Treated poorly during a previous visit
- Could not take time off of work; busy
- Drugs or equipment seemingly inadequate
- Health providers skills seemingly inadequate
- Did not know where to go
- Tried but was denied health care
- Did not think you were sick enough
- Difficulties due to moving/relocating
- Could not find health care facilities or doctor
- Other
- Don't know

---

Please specify \_\_\_\_\_

---

Mark as "Complete" and select "Save and go to next instrument" when complete

# Healthcare Access

## HEALTHCARE ACCESS

I would now like to ask you about your use of the following health services in the last 12 months.

In the last 12 months have you used health services in or nearby [q\_1\_5]?  Yes  
 No  
 Dont know

In the last 12 months, how often have you used the following health services in [q\_1\_5]?

|                                         | 0 times               | Once                  | 2-4 times             | 5-7 times             | 8-12 times            | More than 12 times    |
|-----------------------------------------|-----------------------|-----------------------|-----------------------|-----------------------|-----------------------|-----------------------|
| Government hospital                     | <input type="radio"/> | <input type="radio"/> | <input type="radio"/> | <input type="radio"/> | <input type="radio"/> | <input type="radio"/> |
| Government clinic                       | <input type="radio"/> | <input type="radio"/> | <input type="radio"/> | <input type="radio"/> | <input type="radio"/> | <input type="radio"/> |
| Private hospital, clinic, or doctor     | <input type="radio"/> | <input type="radio"/> | <input type="radio"/> | <input type="radio"/> | <input type="radio"/> | <input type="radio"/> |
| Traditional healer                      | <input type="radio"/> | <input type="radio"/> | <input type="radio"/> | <input type="radio"/> | <input type="radio"/> | <input type="radio"/> |
| Prophet, religious, or spiritual healer | <input type="radio"/> | <input type="radio"/> | <input type="radio"/> | <input type="radio"/> | <input type="radio"/> | <input type="radio"/> |

|                                                                           | Within walking distance (less than an hour) | Within walking distance (more than an hour) | Within 30 minutes by taxis/car/bus | 30-60 minutes by taxis/car/bus | More than 60 minutes by taxis/car/bus | Dont know             |
|---------------------------------------------------------------------------|---------------------------------------------|---------------------------------------------|------------------------------------|--------------------------------|---------------------------------------|-----------------------|
| How far away was the government hospital you visited?                     | <input type="radio"/>                       | <input type="radio"/>                       | <input type="radio"/>              | <input type="radio"/>          | <input type="radio"/>                 | <input type="radio"/> |
| How far away was the government clinic you visited?                       | <input type="radio"/>                       | <input type="radio"/>                       | <input type="radio"/>              | <input type="radio"/>          | <input type="radio"/>                 | <input type="radio"/> |
| How far away was the private hospital, clinic, or doctor you visited?     | <input type="radio"/>                       | <input type="radio"/>                       | <input type="radio"/>              | <input type="radio"/>          | <input type="radio"/>                 | <input type="radio"/> |
| How far away was the traditional healer you visited?                      | <input type="radio"/>                       | <input type="radio"/>                       | <input type="radio"/>              | <input type="radio"/>          | <input type="radio"/>                 | <input type="radio"/> |
| How far away was the prophet, religious, or spiritual healer you visited? | <input type="radio"/>                       | <input type="radio"/>                       | <input type="radio"/>              | <input type="radio"/>          | <input type="radio"/>                 | <input type="radio"/> |

In the last 12 months have you used health services in or nearby [current\_residence]?  Yes  
 No  
 Don't know

In the last 12 months, how often have you used the following health services near [current\_residence]?

|                                         | 0 times               | Once                  | 2-4 times             | 5-7 times             | 8-12 times            | More than 12 times    |
|-----------------------------------------|-----------------------|-----------------------|-----------------------|-----------------------|-----------------------|-----------------------|
| Government hospital                     | <input type="radio"/> | <input type="radio"/> | <input type="radio"/> | <input type="radio"/> | <input type="radio"/> | <input type="radio"/> |
| Government clinic                       | <input type="radio"/> | <input type="radio"/> | <input type="radio"/> | <input type="radio"/> | <input type="radio"/> | <input type="radio"/> |
| Private hospital, clinic, or doctor     | <input type="radio"/> | <input type="radio"/> | <input type="radio"/> | <input type="radio"/> | <input type="radio"/> | <input type="radio"/> |
| Traditional healer                      | <input type="radio"/> | <input type="radio"/> | <input type="radio"/> | <input type="radio"/> | <input type="radio"/> | <input type="radio"/> |
| Prophet, religious, or spiritual healer | <input type="radio"/> | <input type="radio"/> | <input type="radio"/> | <input type="radio"/> | <input type="radio"/> | <input type="radio"/> |

  

|                                                                           | Within walking distance (less than an hour) | Within walking distance (more than an hour) | Within 30 minutes by taxis/car/bus | 30-60 minutes by taxis/car/bus | More than 60 minutes by taxis/car/bus | Dont know             |
|---------------------------------------------------------------------------|---------------------------------------------|---------------------------------------------|------------------------------------|--------------------------------|---------------------------------------|-----------------------|
| How far away was the government hospital you visited?                     | <input type="radio"/>                       | <input type="radio"/>                       | <input type="radio"/>              | <input type="radio"/>          | <input type="radio"/>                 | <input type="radio"/> |
| How far away was the government clinic you visited?                       | <input type="radio"/>                       | <input type="radio"/>                       | <input type="radio"/>              | <input type="radio"/>          | <input type="radio"/>                 | <input type="radio"/> |
| How far away was the private hospital, clinic, or doctor you visited?     | <input type="radio"/>                       | <input type="radio"/>                       | <input type="radio"/>              | <input type="radio"/>          | <input type="radio"/>                 | <input type="radio"/> |
| How far away was the traditional healer you visited?                      | <input type="radio"/>                       | <input type="radio"/>                       | <input type="radio"/>              | <input type="radio"/>          | <input type="radio"/>                 | <input type="radio"/> |
| How far away was the prophet, religious, or spiritual healer you visited? | <input type="radio"/>                       | <input type="radio"/>                       | <input type="radio"/>              | <input type="radio"/>          | <input type="radio"/>                 | <input type="radio"/> |

Mark as "Complete" and select "Save and go to next instrument" when complete

# Food Security and Diet

## FOOD SECURITY & DIET

In an average week how often do you eat a meal from a fast-food or take-away place such as KFC, Steer's, Wimpy's, Spur, etc.

- Never  
 Less than once a week  
 1-2 times a week  
 3-4 times a week  
 5 or more times a week

Have there been any days in the last three months when your household experienced a shortage of food to eat because there was not enough money to buy food?

- Yes  
 No  
 Dont know

How often in the last three months did your household not have enough to eat because there was not enough money to buy food?

- Never  
 Rarely  
 Sometimes  
 Often  
 Very often

Have there been any days in the last year when your household experienced a shortage of food to eat because there was not enough money to buy food?

- Yes  
 No  
 Dont know

Now I want to ask you about how often you eat or drink certain things. Please tell me whether you eat or drink the following: Never, 1-3 times per week, 4-6 times per week, Once a day, 2 times a day, 3 or more times a day

|                                                                        | Never                 | Once or twice a month | 1-3 times per week    | 4-6 times per week    | Once a day            | 2 times a day         | 3 or more times a day |
|------------------------------------------------------------------------|-----------------------|-----------------------|-----------------------|-----------------------|-----------------------|-----------------------|-----------------------|
| Chicken (any)                                                          | <input type="radio"/> | <input type="radio"/> | <input type="radio"/> | <input type="radio"/> | <input type="radio"/> | <input type="radio"/> | <input type="radio"/> |
| Red meat (any)                                                         | <input type="radio"/> | <input type="radio"/> | <input type="radio"/> | <input type="radio"/> | <input type="radio"/> | <input type="radio"/> | <input type="radio"/> |
| Processed meat (polony, ham, viennas, sausages, bacon, meat pies etc.) | <input type="radio"/> | <input type="radio"/> | <input type="radio"/> | <input type="radio"/> | <input type="radio"/> | <input type="radio"/> | <input type="radio"/> |
| Offal and traditional meats (liver, tripe etc.)                        | <input type="radio"/> | <input type="radio"/> | <input type="radio"/> | <input type="radio"/> | <input type="radio"/> | <input type="radio"/> | <input type="radio"/> |
| Fish (fresh/tinned)                                                    | <input type="radio"/> | <input type="radio"/> | <input type="radio"/> | <input type="radio"/> | <input type="radio"/> | <input type="radio"/> | <input type="radio"/> |
| Eggs (any type)                                                        | <input type="radio"/> | <input type="radio"/> | <input type="radio"/> | <input type="radio"/> | <input type="radio"/> | <input type="radio"/> | <input type="radio"/> |
| Milk (including in tea, coffee, cereal etc.)                           | <input type="radio"/> | <input type="radio"/> | <input type="radio"/> | <input type="radio"/> | <input type="radio"/> | <input type="radio"/> | <input type="radio"/> |
| Non-dairy creamer/Cremora                                              | <input type="radio"/> | <input type="radio"/> | <input type="radio"/> | <input type="radio"/> | <input type="radio"/> | <input type="radio"/> | <input type="radio"/> |
| Yoghurt/maas                                                           | <input type="radio"/> | <input type="radio"/> | <input type="radio"/> | <input type="radio"/> | <input type="radio"/> | <input type="radio"/> | <input type="radio"/> |
| Cheese and cottage cheese                                              | <input type="radio"/> | <input type="radio"/> | <input type="radio"/> | <input type="radio"/> | <input type="radio"/> | <input type="radio"/> | <input type="radio"/> |

|                                                                                   |                       |                       |                       |                       |                       |                       |                       |
|-----------------------------------------------------------------------------------|-----------------------|-----------------------|-----------------------|-----------------------|-----------------------|-----------------------|-----------------------|
| Legumes (baked beans, lentils, tinyawa, etc.)                                     | <input type="radio"/> | <input type="radio"/> | <input type="radio"/> | <input type="radio"/> | <input type="radio"/> | <input type="radio"/> | <input type="radio"/> |
| Peanuts and nuts (including peanut butter)                                        | <input type="radio"/> | <input type="radio"/> | <input type="radio"/> | <input type="radio"/> | <input type="radio"/> | <input type="radio"/> | <input type="radio"/> |
| White and traditional bread                                                       | <input type="radio"/> | <input type="radio"/> | <input type="radio"/> | <input type="radio"/> | <input type="radio"/> | <input type="radio"/> | <input type="radio"/> |
| Brown and wholemeal bread                                                         | <input type="radio"/> | <input type="radio"/> | <input type="radio"/> | <input type="radio"/> | <input type="radio"/> | <input type="radio"/> | <input type="radio"/> |
| Breakfast cereals                                                                 | <input type="radio"/> | <input type="radio"/> | <input type="radio"/> | <input type="radio"/> | <input type="radio"/> | <input type="radio"/> | <input type="radio"/> |
| Cooked porridge (pap, maize, sorghum, oat)                                        | <input type="radio"/> | <input type="radio"/> | <input type="radio"/> | <input type="radio"/> | <input type="radio"/> | <input type="radio"/> | <input type="radio"/> |
| Fat cakes, samosas and pizza                                                      | <input type="radio"/> | <input type="radio"/> | <input type="radio"/> | <input type="radio"/> | <input type="radio"/> | <input type="radio"/> | <input type="radio"/> |
| Margarine (hard/soft)                                                             | <input type="radio"/> | <input type="radio"/> | <input type="radio"/> | <input type="radio"/> | <input type="radio"/> | <input type="radio"/> | <input type="radio"/> |
| Green vegetables                                                                  | <input type="radio"/> | <input type="radio"/> | <input type="radio"/> | <input type="radio"/> | <input type="radio"/> | <input type="radio"/> | <input type="radio"/> |
| Salad vegetables                                                                  | <input type="radio"/> | <input type="radio"/> | <input type="radio"/> | <input type="radio"/> | <input type="radio"/> | <input type="radio"/> | <input type="radio"/> |
| Other vegetables                                                                  | <input type="radio"/> | <input type="radio"/> | <input type="radio"/> | <input type="radio"/> | <input type="radio"/> | <input type="radio"/> | <input type="radio"/> |
| Boiled potatoes                                                                   | <input type="radio"/> | <input type="radio"/> | <input type="radio"/> | <input type="radio"/> | <input type="radio"/> | <input type="radio"/> | <input type="radio"/> |
| Roast potatoes and chips                                                          | <input type="radio"/> | <input type="radio"/> | <input type="radio"/> | <input type="radio"/> | <input type="radio"/> | <input type="radio"/> | <input type="radio"/> |
| Citrus fruit (naartjies, oranges, grapefruit, lemons)                             | <input type="radio"/> | <input type="radio"/> | <input type="radio"/> | <input type="radio"/> | <input type="radio"/> | <input type="radio"/> | <input type="radio"/> |
| Other fruit                                                                       | <input type="radio"/> | <input type="radio"/> | <input type="radio"/> | <input type="radio"/> | <input type="radio"/> | <input type="radio"/> | <input type="radio"/> |
| Fruit juices                                                                      | <input type="radio"/> | <input type="radio"/> | <input type="radio"/> | <input type="radio"/> | <input type="radio"/> | <input type="radio"/> | <input type="radio"/> |
| Rice and pasta                                                                    | <input type="radio"/> | <input type="radio"/> | <input type="radio"/> | <input type="radio"/> | <input type="radio"/> | <input type="radio"/> | <input type="radio"/> |
| Samp and mielie rice                                                              | <input type="radio"/> | <input type="radio"/> | <input type="radio"/> | <input type="radio"/> | <input type="radio"/> | <input type="radio"/> | <input type="radio"/> |
| Cakes and biscuits                                                                | <input type="radio"/> | <input type="radio"/> | <input type="radio"/> | <input type="radio"/> | <input type="radio"/> | <input type="radio"/> | <input type="radio"/> |
| Puddings (including ice-cream, custard etc.)                                      | <input type="radio"/> | <input type="radio"/> | <input type="radio"/> | <input type="radio"/> | <input type="radio"/> | <input type="radio"/> | <input type="radio"/> |
| Cooking fats and salad oils                                                       | <input type="radio"/> | <input type="radio"/> | <input type="radio"/> | <input type="radio"/> | <input type="radio"/> | <input type="radio"/> | <input type="radio"/> |
| Sweets and chocolate                                                              | <input type="radio"/> | <input type="radio"/> | <input type="radio"/> | <input type="radio"/> | <input type="radio"/> | <input type="radio"/> | <input type="radio"/> |
| Crisps, nik naks, etc                                                             | <input type="radio"/> | <input type="radio"/> | <input type="radio"/> | <input type="radio"/> | <input type="radio"/> | <input type="radio"/> | <input type="radio"/> |
| Added sugar (teaspoons; tea, coffee, cereal etc.)                                 | <input type="radio"/> | <input type="radio"/> | <input type="radio"/> | <input type="radio"/> | <input type="radio"/> | <input type="radio"/> | <input type="radio"/> |
| Tea and coffee                                                                    | <input type="radio"/> | <input type="radio"/> | <input type="radio"/> | <input type="radio"/> | <input type="radio"/> | <input type="radio"/> | <input type="radio"/> |
| High-energy soft drinks (including cool drinks, fizzy drinks, squashes etc.)      | <input type="radio"/> | <input type="radio"/> | <input type="radio"/> | <input type="radio"/> | <input type="radio"/> | <input type="radio"/> | <input type="radio"/> |
| Diet soft drinks                                                                  | <input type="radio"/> | <input type="radio"/> | <input type="radio"/> | <input type="radio"/> | <input type="radio"/> | <input type="radio"/> | <input type="radio"/> |
| Sauces (mayonnaise, tomato sauce, chutney, stock, etc.)                           | <input type="radio"/> | <input type="radio"/> | <input type="radio"/> | <input type="radio"/> | <input type="radio"/> | <input type="radio"/> | <input type="radio"/> |
| Alcoholic beverages (beer, wine, spirits, fermented cider, traditional beer, etc) | <input type="radio"/> | <input type="radio"/> | <input type="radio"/> | <input type="radio"/> | <input type="radio"/> | <input type="radio"/> | <input type="radio"/> |

---

Mark as "Complete" and select "Save and go to next instrument" when complete

# Tobacco and Alcohol Use

## TOBACCO AND ALCOHOL USE

Now I am going to ask you some questions about various health behaviours. This includes things like smoking, drinking alcohol, and physical activity. Lets start with tobacco.

Have you ever smoked tobacco regularly?

- No, never
- Yes, daily
- Yes, less than daily
- Yes, but not now
- Don't know

Do you currently smoke/chew/use (you will use if you have the possibility) any tobacco products, such as cigarettes, cigars, pipes, chewing tobacco, or snuff?

- Yes
- No
- Dont know

How often do you smoke or use any tobacco products?

- Never in the past month
- 1-3 days per month
- 1-4 days per week
- 5-6 days per week
- Daily
- Don't know

How old were you when you first started smoking?

- < 10 yrs old
- 10-13
- 14-17
- 18-21
- 22-25
- 26-30
- 31-35
- > 35 yrs old
- Don't know

On average, how many cigarettes, pipes of tobacco, cigars, cheroots, etc do you smoke each day?

- 0
- 1-2
- 3-4
- 5-6
- 7 or more

When did you stop smoking? MONTH

- January
- February
- March
- April
- May
- June
- July
- August
- September
- October
- November
- December
- Don't know

---

When did you stop smoking? YEAR

- 2019
- 2018
- 2017
- 2016
- 2015
- 2014
- 2013
- 2012
- 2011
- 2010
- 2009
- 2008
- 2007
- 2006
- 2005
- 2004
- 2003
- 2002
- 2001
- 2000
- 1999
- 1998
- 1997
- 1996
- 1995
- 1994
- 1993
- 1992
- 1991
- 1990
- 1989
- 1988
- 1987
- 1986
- 1985
- 1984
- 1983
- 1982
- 1981
- 1980

---

The next questions ask about the consumption of alcohol.

---

Have you consumed an alcoholic drink such as beer, wine, spirits, fermented cider, or traditional beer in the last 12 months?

- Yes
- No
- Dont know

---

How often do you have at least one alcoholic drink?

- Never
  - Less than once a month
  - 1-3 days a month
  - 1-4 days a week
  - 5-6 days a week
  - Daily
  - Don't know
- ( One drink is equal to 350ml beer, 150ml of wine, or a shot of spirits.)

---

On days you drink, how many alcoholic drinks do you have?

- 1-2 drinks
  - 3-4 drinks
  - 5-6 drinks
  - 7-10 drinks
  - More than 10 drinks
- ( One drink is equal to 350ml beer, 150ml of wine, or a shot of spirits.)

---

In the past month, did you ever drink enough alcohol to become drunk?

- Yes
- No
- Dont know

---

How many times did this happen in the last month?

- 1
- 2-3
- 4-5
- 5-6
- 7-10
- 11-15
- 15 or more

---

Mark as "Complete" and select "Save and go to next instrument" when complete



# Sedentary Behaviour and Sleep

---

## SEDENTARY BEHAVIOUR AND SLEEP

The following question is about sitting or reclining at work, at home, or with friends including time spent sitting at a desk, sitting with friends, travelling in car, bus, reading, playing cards or watching television, but do not include time spent sleeping.

How much time do you usually spend sitting or reclining on a typical day?

- Less than an hour
- 1-2 hours
- 2-4 hours
- 4-6 hours
- 6-10 hours
- More than 10 hours
- Dont know

How many days a week do you exercise (strenuous physical activity or sport) for at least 10 min?

- Never
- 1-3 days a week
- 4-5 days a week
- 6-7 days a week

On days you exercise, how long do you usually spend exercising (strenuous physical activity or sport)?

- None
- 0-14 minutes
- 15-29 minutes
- 30-59 minutes
- 60-90 minutes
- More than 90 minutes
- Don't know

## SLEEP

The following questions relate to your usual sleep habits during the past month only. Your answers should indicate the most accurate reply for the majority of days and nights in the past month.

---

During the past month, what time have you usually gone to bed at night?

- 12am (midnight)
- 1am
- 2am
- 3am
- 4am
- 5am
- 6am
- 7am
- 8am
- 9am
- 10am
- 11am
- 12pm
- 1pm
- 2pm
- 3pm
- 4pm
- 5pm
- 6pm
- 7pm
- 8pm
- 9pm
- 10pm
- 11pm

---

During the past month, how long (in minutes) has it usually taken you to fall asleep each night?

- 0-10min
- 11-20min
- 21-30min
- 31-45min
- 46-59 min
- 1-1.5 hours
- Over 1.5 hours
- Don't know

---

During the past month, what time have you usually gotten up in the morning?

- 12am
- 1am
- 2am
- 3am
- 4am
- 5am
- 6am
- 7am
- 8am
- 9am
- 10am
- 11am
- 12pm
- 1pm
- 2pm
- 3pm
- 4pm
- 5pm
- 6pm
- 7pm
- 8pm
- 9pm
- 10pm
- 11pm

During the past month, how many hours of actual sleep did you get at night?(This may be different than the number of hours you spent in bed.)

- less than 4 hours  
 4-5 hours  
 5-6 hours  
 6-7 hours  
 7-8 hours  
 8-9 hours  
 over 9 hours

During the past month, how often have you had trouble sleeping because you . . .

### SLEEP

|                                                     | Not during the past month | Less than once a week | Once or twice a week  | Three or more times a week | Dont know             |
|-----------------------------------------------------|---------------------------|-----------------------|-----------------------|----------------------------|-----------------------|
| Cannot get to sleep within 30 minutes               | <input type="radio"/>     | <input type="radio"/> | <input type="radio"/> | <input type="radio"/>      | <input type="radio"/> |
| Wake up in the middle of the night or early morning | <input type="radio"/>     | <input type="radio"/> | <input type="radio"/> | <input type="radio"/>      | <input type="radio"/> |
| Cannot breathe comfortably                          | <input type="radio"/>     | <input type="radio"/> | <input type="radio"/> | <input type="radio"/>      | <input type="radio"/> |
| Cough or snore loudly                               | <input type="radio"/>     | <input type="radio"/> | <input type="radio"/> | <input type="radio"/>      | <input type="radio"/> |
| Have pain                                           | <input type="radio"/>     | <input type="radio"/> | <input type="radio"/> | <input type="radio"/>      | <input type="radio"/> |

Mark as "Complete" and select "Save and go to next instrument" when complete

# Anthropometrics and Biomarkers

## BLOOD PRESSURE & PULSE

Now we are going to take the measurements that we were talking about at the beginning. We will give you these measurements if you would like them. We will take your blood pressure 3 times and need to wait 2-3 minutes between measurements.

Reading 1: Systolic (SYS) (Hg)

---

Reading 1: Diastolic (DIA) (Hg)

---

Reading 1: Pulse (bpm)

---

Reading 2: Systolic (SYS) (Hg)

---

Reading 2: Diastolic (DIA) (Hg)

---

Reading 2: Pulse (bpm)

---

Reading 3: Systolic (SYS) (Hg)

---

Reading 3: Diastolic (DIA) (Hg)

---

Reading 3: Pulse (bpm)

---

## HEIGHT, WEIGHT, AND WAIST MEASUREMENTS

Height (cm)

(Must include one decimal place (i.e. 145.0))

Are you pregnant? (Only ask of women)

- Yes  
 No  
 Don't know

Weight (kgs)

(Weight must include one decimal (e.g. 97.8). Enter 111.1 if too heavy for scale; make a note in the interview notes as well))

---

Body Mass Index:

---

---

Waist circumference (cm):

---

---

**DRY BLOOD SPOTS**

---

(FOR INTERVIEWER) Collect the Dry Blood Spots now.

---

(FOR INTERVIEWER) Have the dried blood spots been collected?

Yes  
 No

---

Does the respondent want the results of the blood glucose test reported back to them?

Yes  
 No  
(Note: respondent must give a phone number and/or email address to have results reported back)

---

Scan DBS Barcode

---

---

Manually enter barcode if barcode scanner is not working:

---

---

Confirm manually entered barcode:

---

---

Mark as "Complete" and select "Save and go to next instrument" when complete

# Sexual Partnership

---

---

## SEXUAL PARTNERSHIP

The following section asks questions about your sexual practices over the last 12 months. Because a broad range of men and women are participating in this study, some of the questions may not apply to you. However, we ask the same questions to all participants. Your answers are completely confidential.

---

During the last 12 months, how many sexual partners have you had? \_\_\_\_\_

---

Of the [q\_21\_1] of partners you've had in the last 12 months, how many lived in or near [q\_1\_5]? \_\_\_\_\_

---

Of the [q\_21\_1] of partners you've had in the last 12 months, how many live in [current\_residence] or outside [q\_1\_5]? \_\_\_\_\_

---

Note to interviewer: Total is [q\_21\_1\_3]. Total should be [q\_21\_1] . \_\_\_\_\_

---

How many TOTAL sexual partners have you had in your lifetime? \_\_\_\_\_

---

When was the last time you had sexual intercourse?  
MONTH

- January
- February
- March
- April
- May
- June
- July
- August
- September
- October
- November
- December
- Don't know

---

When was the last time you had sexual intercourse?  
YEAR

- 2019
- 2018
- 2017
- 2016
- 2015
- 2014
- 2013
- 2012
- 2011
- 2010
- 2009
- 2008
- 2007
- 2006
- 2005
- 2004
- 2003
- 2002
- 2001
- 2000
- 1999
- 1998
- 1997
- 1996
- 1995
- 1994
- 1993
- 1992
- 1991
- 1990
- 1989
- 1988
- 1987
- 1986
- 1985
- 1984
- 1983
- 1982
- 1981
- 1980

---

For the next question(s), follow these definitions:

Regular partner: is someone who is special to you, like a husband / wife / boyfriend / girlfriend, or lover.

Casual partner: is a person you know but are not in a relationship with, whether you had sex only once or many times.

Anonymous partner: is someone whose name you did not know the day before you had sex. A sex partner who is a prostitute could be either casual or anonymous

---

Was your most recent sexual partner:

- Regular
- Casual
- Anonymous
- Don't know

---

Where was your most recent sexual intercourse with this partner?

- Same village/neighbourhood in [q\_1\_5]
- Village/neighbourhood nearby [q\_1\_5]
- Same village/neighbourhood in [current\_residence]
- Village/neighbourhood nearby [current\_residence]
- Other
- Don't know

(If the answer categories repeat (i.e. origin location and current residence are the same), select the answer from the first two options (unless other or don't know))

---

Please specify

---

---

Did you use a condom the last time you had sexual intercourse?

- Yes
- No
- Dont know

---

Why did you not use a condom?

- Didn't have one
- Convenience
- Decreased pleasure
- Didn't want to ruin the "mood"
- Trusted partner
- Trying to get pregnant
- Other
- Dont know

---

Please specify

---

---

The first time you had sex with this partner, did you know his or her HIV status?

- Yes
- No
- Dont know

---

What is your relationship with this partner?

- Boyfriend
- Girlfriend
- Living together without lobola
- Spouse (civil married) without lobola
- Spouse with lobola done
- Don't know

---

When did you get married or start living together?  
MONTH

- January
- February
- March
- April
- May
- June
- July
- August
- September
- October
- November
- December
- Don't know



---

When did you get married or start living together?  
YEAR

- 2019
- 2018
- 2017
- 2016
- 2015
- 2014
- 2013
- 2012
- 2011
- 2010
- 2009
- 2008
- 2007
- 2006
- 2005
- 2004
- 2003
- 2002
- 2001
- 2000
- 1999
- 1998
- 1997
- 1996
- 1995
- 1994
- 1993
- 1992
- 1991
- 1990
- 1989
- 1988
- 1987
- 1986
- 1985
- 1984
- 1983
- 1982
- 1981
- 1980

---

Is this relationship ongoing?

- Yes
- No
- Dont know

---

In the last 12 months have you had symptoms of, been diagnosed with, or have you been treated for a sexually transmitted disease? [such as trichomonas, gonorrhea or Chlamydia, drop, or any bad smelling/abnormal vaginal or penile discharge, sore or ulcer]

- Yes
- No
- Dont know

---

Mark as "Complete" and select "Save and go to next instrument" when complete

# HIV

---

## HIV

Have you ever had an HIV test?

- Yes
- No
- Dont know

---

When were you tested the last time? MONTH

- January
  - February
  - March
  - April
  - May
  - June
  - July
  - August
  - September
  - October
  - November
  - December
  - Don't know
- (If respondent does not know exact date, use best estimate)

---

When were you tested the last time? YEAR

- 2019
- 2018
- 2017
- 2016
- 2015
- 2014
- 2013
- 2012
- 2011
- 2010
- 2009
- 2008
- 2007
- 2006
- 2005
- 2004
- 2003
- 2002
- 2001
- 2000
- 1999
- 1998
- 1997
- 1996
- 1995
- 1994
- 1993
- 1992
- 1991
- 1990
- 1989
- 1988
- 1987
- 1986
- 1985
- 1984
- 1983
- 1982
- 1981
- 1980

(If respondent does not know exact date, use best estimate)

---

Where was your most recent test done?

- Same village/neighbourhood in [q\_1\_5]
- Village/neighbourhood nearby [q\_1\_5]
- Same village/neighbourhood in [current\_residence]
- Village/neighbourhood nearby [current\_residence]
- Other
- Don't know

(If the answer categories repeat (i.e. origin location and current residence are the same), select the answer from the first two options (unless other or don't know))

---

Please specify

---



---

Did you receive your results?

- Yes
- No
- Dont know

---

If you wouldn't mind sharing, what was the result of your most recent HIV test?

- Positive
- Negative
- Don't want to say/Refuse
- Don't know

---

Have you ever informed anyone about your HIV status?

- Yes
- No
- Dont know

---

Who did you inform about your HIV status?

- Spouse/current partner
- Girlfriend/boyfriend
- Parent
- Brother/sister
- Relative
- Friend
- Religious leader
- Other
- Don't know

---

Please specify

---

---

Have you ever been on antiretrovirals/ARTs?

- Yes
- No
- Dont know

---

Are you currently on antiretrovirals/ARTs?

- Yes
- No
- Dont know

---

Mark as "Complete" and select "Save and go to next instrument" when complete

# Conclusion

---

---

---

---

---

## CONCLUSION

END: Many thanks for your time and contribution to the study. We will be contacting you again a year from now to follow up. Can you please provide the best way to get in touch with you a year from now.

Telephone # 

---

Email address 

---

Telephone # of a friend or relative #1 

---

Email address of a friend or relative #1 

---

Telephone # of a friend or relative #2 

---

Email address of a friend or relative #2 

---

End time of interview 

---

Interview Length 

---
